1 **Whole plant community transplants across climates reveal total community**  
2 **stability due to large shifts in species assemblage**

3

4 Authors: Sara Tomiolo<sup>a,b\*</sup>, Mark C. Bilton<sup>a</sup>, Katja Tielbörger<sup>a</sup>

5 **Affiliation:**

6 a- Department of Ecology and Evolution, Plant Ecology Group, University of

7 Tübingen, Auf der Morgenstelle 5, 72076 Tübingen, Germany

8 b- Department of Bioscience, Aarhus University, Vejlsovej 25, 8600 Silkeborg,

9 Denmark

10 **Contacts:**

11 \*Corresponding author: [sara.tomiolo@gmail.com](mailto:sara.tomiolo@gmail.com); **Orcid ID:** [orcid.org/0000-0002-](https://orcid.org/0000-0002-5071-5851)  
12 5071-5851

13 Mark C. Bilton: [mark.bilton@uni-tuebingen.de](mailto:mark.bilton@uni-tuebingen.de)

14 Katja Tielbörger: [katja.tielboerger@uni-tuebingen.de](mailto:katja.tielboerger@uni-tuebingen.de)

15 **Running headline:** Community stability under climate change

16 **Keywords:** annual plant communities, climate change, Climatic Niche Groups,

17 community ecology, reciprocal transplants, determinants of plant community

18 diversity and assemblage, distribution range, community stability, field experiments

19

## 20 **Abstract**

21 Climate change will decrease average precipitation and increase rainfall  
22 variability in Eastern Mediterranean regions. This may affect the performance of  
23 many plant species either directly or via altered biotic interactions in ways that are  
24 hard to predict. In such highly fluctuating climates, year-to-year community variation  
25 may override long-term selection processes, thus masking directional community  
26 responses to climate change.

27 Here we tested short-term responses of dryland plant communities to sharp  
28 changes in climatic conditions, by means of whole community reciprocal transplants  
29 of soil and seed banks. We exposed annual plant communities to two very different  
30 climates (Mediterranean and semi-arid) and measured changes in community  
31 composition, total biomass, plant density, and species diversity. In addition, we  
32 grouped species into dry-adapted and wet-adapted species in each community.

33 Our results revealed that climate played a large role in determining community  
34 assembly. For both community origins, we observed a relative increase of dry-adapted  
35 species when exposed to the drier climate, and a relative increase in wet-adapted  
36 species in the wetter climate. However, the compositional shifts were much larger in  
37 semi-arid origin communities. At the same time community density, biomass and  
38 species richness remained remarkably stable across climates, indicating that  
39 community stability was maintained between climates by predictable asynchronous  
40 shifts of species. Similar but smaller shifts were present in the Mediterranean origin  
41 communities, where exposure to the drier climate reduced biomass and species  
42 richness.

43 Our study suggests that large asynchronous variation in species abundances,  
44 matching high year-to-year rainfall variability, may provide a mechanism for

45 community homeostasis, and slow down selection processes in response to climate  
46 change. However, increased occurrence of extreme droughts exceeding the climatic  
47 fluctuations to which species are adapted may, in the long-term, lead to loss of wet-  
48 adapted species.  
49

## 50        **Introduction**

51        Understanding how climate may alter overall available resources (Sardans et al.  
52        2008, Garcia et al. 2014) and impact upon community structure (Tilman and Downing  
53        1994, Gilman et al. 2010) is a major challenge in current ecological research (Maestre  
54        et al. 2012, Parmesan and Hanley 2015). In cold regions for example, warming is  
55        likely to improve growing conditions and thus increase plant community biomass by  
56        increasing nutrient mobilization and expanding the length of the growing season  
57        (Garcia et al. 2014). In contrast, decreased rainfall in drier regions will likely have  
58        negative impacts on primary productivity, community composition, and their  
59        corresponding ecosystem services (Sala and Lauenroth 1982, Peñuelas et al. 2007,  
60        Miranda et al. 2011). These effects may be particularly strong in those dryland  
61        ecosystems for which climate predictions indicate increasing incidents of droughts  
62        (Cubasch et al. 1996, Smiatek et al. 2011). Here, droughts and increasing  
63        temperatures will increase evapotranspiration, shorten the growing season and limit  
64        access to nutrients, thereby decreasing total community biomass (Peñuelas et al. 2007,  
65        Doblas-Miranda et al. 2015, Harrison et al. 2015). In extreme cases, this may lead to  
66        the collapse of entire ecological communities (Forey et al. 2010).

67        One of the predicted impacts of climate change is a re-assembly of plant  
68        communities (Hobbs et al. 2006, Williams and Jackson 2007, Alexander et al. 2016)  
69        due to the differential ability of single species to either track their climatic niche or to  
70        survive under changed conditions, by means of adaptation or plasticity (Fernandez-  
71        Going et al. 2013, Shi et al. 2015). Such community reshuffling may be expressed in a  
72        loss or gain of certain species, a shift in species relative abundance or both. In plant  
73        communities already exposed to large inter-annual variations in climate, immediate  
74        rearrangement of community assembly in response to climate extremes may be an

75 inherent property of plant communities, and may promote community stability in the  
76 long-term. This effect is particularly pronounced when species numbers are large and  
77 population sizes vary asynchronously (Doak et al. 1998, Schindler et al. 2015).  
78 Indeed, ecological theory and models support the idea that high inter-annual variation  
79 in species response to climate can lead to community-level stability (Anderson et al.  
80 1982, Tilman et al. 1998, Thompson et al. 2015, Abbott et al. 2017). This may be an  
81 important mechanism for maintaining dryland communities' stability in response to  
82 large year-to-year variation in rainfall, and for slowing down ongoing selection  
83 processes due to climate change (Bonebrake and Mastrandrea 2010, Bilton et al.  
84 2016).

85       Although long-term climate manipulations are the gold standard in ecological  
86 climate impact research and are fundamental to understanding long-term community  
87 shifts (Brown et al. 2001, Rinnan et al. 2007, Blume-Werry et al. 2016), they are very  
88 costly to set up and maintain, often outliving funding cycles and scientific research  
89 positions (Lindenmayer et al. 2012). The monitoring of communities for short-term  
90 responses may be a useful complement to long-term experiments, as besides being  
91 less costly, can be vitally important for parsing mechanistic information about plant  
92 responses to large inter-annual variation, as well as extreme events (De Dato et al.  
93 2006, Barbosa et al. 2014, Blume-Werry et al. 2016). Reciprocal transplants represent  
94 a promising approach for indirectly studying plant responses to climate change on a  
95 short temporal scale. These manipulative experiments have been widely adopted in  
96 single species (e.g. Link et al. 2003, Casper and Castelli 2007, Macel et al. 2007,  
97 Alexander et al. 2015, Tomiolo et al. 2015) for studying local adaptation and, more  
98 recently, for studying their responses to a climate that matches conditions predicted  
99 by climate change scenarios (the so called "space-for-time approach"). Reciprocal

100 transplants have also been applied to entire communities in studies of soil  
101 microbiomes (Waldrop and Firestone 2006, Lazzaro et al. 2011), leaf litter (Ayres et  
102 al. 2009, Allison et al. 2013), and occasionally to whole plant communities in  
103 different habitats ranging from wetlands to alpine grasslands (Maranon and  
104 Bartolome 1993, Wetzel et al. 2004, Wu et al. 2012, Alexander et al. 2015). However,  
105 the potential for using whole community reciprocal transplants to study plant  
106 community response to climate change has not been fully exploited, particularly in  
107 dryland systems, which often provide ideal conditions.

108       Dryland ecosystems are often dominated by annual plants that survive the dry  
109 season as a permanent seed bank (Cohen 1966). Therefore, the community (i.e. the  
110 seed bank) can be conveniently transplanted as a whole during the dry season without  
111 any harm to the plants. In addition, by transplanting seed banks with their associated  
112 soil, it is possible to evaluate plant communities' response to climate while preserving  
113 soil abiotic and biotic interactions. To test the response of dryland annual plant  
114 communities characterized by very different climates, we transplanted home soil with  
115 seed bank among three sites situated along a steep aridity gradient in the Eastern  
116 Mediterranean region, ranging from an arid to Mediterranean climate. In this region,  
117 rainfall is the main limiting factor to plant growth (Ziv et al. 2014) and differs up to 5-  
118 fold between the driest and wettest site (Holzapfel et al. 2006). The study sites used  
119 for our reciprocal transplant also hosted a long-term climate manipulation experiment  
120 (Tielbörger et al. 2014). This allowed for a comparison between long-term dynamics,  
121 resulting from consistently imposed climate change, and the short-term responses  
122 observed in our transplant experiment. Finally, we classified species based on their  
123 climatic requirements, adopting the Climatic Niche Group approach (CNG; *sensu*  
124 Bilton et al. 2016) that has been successfully employed for the species in our study

125 region (Bilton et al. 2016) and in other dryland ecosystems (Liu et al. 2018). By  
126 identifying those species responsive to drier or wetter conditions, the CNG approach  
127 provided us with testable predictions about shifts in community assembly across  
128 climates within the reciprocal transplants.

129 We predicted that the community emerging from the reciprocal soil transplants  
130 would be greatly determined by community origin, with less individuals emerging  
131 from drier origins than wetter origins. Secondly, we hypothesized that the climate (i.e.  
132 rainfall availability) at the transplant site would affect the emerging communities,  
133 resulting in less biomass and less individuals emerging from community origins  
134 exposed to drier climates. We also predicted that climate would select the emerging  
135 community from the species pool of each origin in a predictable manner, with more  
136 wet adapted species emerging in communities exposed to wetter climates, and more  
137 dry-adapted species in drier climates.

138

## 139 **Methods**

### 140 **Study area**

141 This study was conducted in Israel at three fenced sites (area approximately 100 m  
142 x 400 m) with respectively Mediterranean (M) semi-arid (SA), and arid (A) climate.  
143 The three study sites share the same calcareous bedrock, southern aspect, altitude and  
144 mean annual temperatures, so that they differ chiefly in mean and variance of annual  
145 rainfall, and vegetation. The M site is located southwest of Jerusalem (N 31° 42' E  
146 35° 3') at 620 masl, on Terra Rossa soil. The climate is characterized by 550 mm  
147 average annual rainfall with 20% inter-annual variation. The SA site (N 31° 23' E 34°  
148 54') is located in the northern portion of the Negev Desert near the city of Beersheba,  
149 at 590 masl, on Light Brown Rendzina. Average annual rainfall is 270 mm with

150 approximately 30% inter-annual variation. The A site is located in the central Negev  
151 near Sde Boqer (N 30°52' E 34°46') at 470 masl, on desert Lithosol. Average annual  
152 rainfall amounts to 90 mm with 43% inter-annual variation (Holzapfel et al. 2006).  
153 The plant communities at the three sites are semi-natural shrublands dominated by  
154 *Sarcopoterium spinosum* (L.) Spach, and winter annuals (approx. 85% of all species)  
155 that persist during summer in the form of dormant seed banks stored in the soil (Noy-  
156 Meir 1973, Alon and Steinberger 1999). The species pool is overlapping among sites,  
157 and annual plant cover amounts to 25% at the M site, 10% at the SA site, and < 1% at  
158 the A site (Tielbörger et al. 2014).

### 159 **Experimental set up**

160 During the summer of 2010, we collected soil with seed bank from forty square  
161 plots (20cm x 20cm, depth: 5cm) at the M and A sites and sixty plots at the SA site.  
162 Within each site, plots were situated at least 20 cm apart from each other and away  
163 from rocks and shrubs. Following Tomiolo et al. (2015) soil collected from each site  
164 was pooled to produce a baseline community as there is substantial small-scale  
165 heterogeneity in the seed bank (Siewert and Tielbörger 2010). The soil was stored in a  
166 net-house at the University of Rehovot, Israel, where it experienced summer  
167 temperatures necessary for breaking seed dormancy (Baskin et al. 1993). In  
168 September 2010, twenty of the previously excavated plots at each site were randomly  
169 selected and filled with home soil, while the remaining plots were filled with soil  
170 from the closest away-from-home site (i.e. M site received M and SA soil; SA site  
171 received M, SA and A soil; A site received SA and A soil, Supplementary Material  
172 Appendix 1 Fig. A1). Transplanted soil was separated from the surrounding soil by a  
173 layer of absorbent paper that provided initial isolation between soils, while not  
174 impeding water percolation. After transplanting, we placed patches of organza (a thin



175 transparent fabric) over the surface of each plot to avoid contamination from seed  
176 dispersal or seed predation (Petru and Tielbörger 2008), and we removed them at the  
177 time of germination.

178 Because the transplants were carried out during the dormant season we could  
179 relocate the community of dormant seeds and soil biota with minimum damage. By  
180 transplanting communities with their maternal soil we could test direct effects of  
181 climate (e.g. decreasing rainfall) while preserving biotic interactions with  
182 neighbouring plants and soil biota, which are also affected by the novel climate  
183 (Emmett et al. 2004). At peak development (spring 2011), we recorded the identity  
184 and number of individuals of the emerging species in each plot. In order to minimize  
185 edge effects, we excluded plants growing in the outer 1 cm margin of each plot. After  
186 species identification, aboveground biomass was collected, oven-dried at 70°C for 48  
187 hours and weighed.

188 Unfortunately, the season of recording was very dry and the arid site received  
189 only 30% of the average annual rainfall. Therefore, only a handful of seedlings of two  
190 desert species (*Stipa capensis*, *Erodium touchyanum*) emerged at the arid site. As a  
191 result, there was no home arid community to be compared to the transplants, and we  
192 had to restrict our subsequent analyses to the reciprocal transplants between the SA  
193 and M community origins.

194

### 195 **Climatic Niche Groups (CNG)**

196 Each species within the target communities was assigned to a Climatic Niche  
197 Group (Bilton et al. 2016) classified by their distribution range in relation to rainfall.  
198 A similar method has been employed for defining thermal niches of species in high  
199 elevation and tundra habitats (Gottfried et al. 2012, Elmendorf et al. 2015), and

200 ideologically similar for Ellenberg values, which determine species habitat  
201 requirements based on several abiotic parameters (Ellenberg 1974).

202 The rationale for the CNG grouping is that rainfall is the main driver of  
203 community composition in the region, therefore species sharing similar climate  
204 adaptations (approximated by the realized climatic rainfall niche) are likely to co-  
205 occur in the same community by virtue of habitat filtering (García-Camacho et al.  
206 2017). Species realized climatic niche values were derived as in Bilton et al. (2016).  
207 For each single species the observed occurrences within Israel (distribution range)  
208 were overlaid with mean annual rainfall climate data, and the mean value was taken  
209 (obtained from BioGIS 2012, available at <http://www.biogis.huji.ac.il/>). Boundaries  
210 between climatic niche groups spanned similar ranges of average annual rainfall  
211 (approximately 130 mm) and resulted in four groups that ranked species with respect  
212 to their hypothesized response to climate. Climatic Niche Group 1 (CNG1)  
213 represented species associated with the lowest rainfall extremes of the gradient,  
214 conversely CNG4 gathered species distributed in areas with high rainfall. Species  
215 from all four CNGs were present in both communities (Supplementary Material,  
216 Appendix 2 Table A1), but varied in their proportional representation at each site, and  
217 could therefore be compared across sites and climates (Bilton et al. 2016).

218

### 219 **Statistical analyses**

220 We first analyzed how total density (number of individuals per plot), biomass,  
221 species richness (number of species per plot), evenness (Simpson's evenness) and  
222 diversity (Shannon-Wiener Index) varied in response to climate, community origin  
223 and their interaction. In addition, we analyzed how the number of individuals  
224 belonging to each climatic niche group per plot (i.e. CNG density) varied in response

225 to climate, community origin, with respect to the four-level categorical explanatory  
226 variable CNG identity (i.e. CNG1 – CNG4), including all two-way and three-way  
227 interactions. We applied generalized linear models with negative binomial  
228 distribution to total individual, CNG density and species richness using the MASS  
229 package (Venables et al. 2002) within the R software version 2.14 (R Development  
230 Core Team 2014). Biomass, species diversity and evenness were analyzed using  
231 linear models. To meet model requirements, evenness was log transformed and  
232 biomass square root transformed. The significance of the models was assessed with a  
233 Type 3 ANOVA, using the “car” package (Fox and Weisberg 2011). Post-hoc tests  
234 were conducted using Tukey HSD test. Visual representation of the CNG density  
235 interactions was done using log-ratios ( $\log(\text{SA density} + 1) - \log(\text{M density} + 1)$ ).

236 For testing how species composition varied with community origin and climate  
237 we used Redundancy Analysis (RDA, (Legendre et al. 2011)) in the R package  
238 ‘vegan’ (Oksanen et al. 2015). The interaction term was included in a full model and  
239 confirmed using a step-wise approach. The data were Hellinger transformed  
240 (Legendre and Gallagher 2001) and scaled within plots. Significance of the model  
241 was tested using 999 permutations. To test if species composition could be explained  
242 by rainfall distribution range we regressed the resulting RDA ‘species mean scores’  
243 against the ‘climatic niche value’ of each species, both for individual species and for  
244 the CNG classifications. Furthermore, we performed an RDA on the community-  
245 weighted means (Garnier et al. 2007) using the species ‘climatic niche value’ as a  
246 pseudo-trait.

247

## 248 **Results**

249 Overall, 97 species were recorded, among which 12.3% were grasses, 23.7%  
250 legumes and 64% belonged to other families (Supplementary Material, Appendix 2  
251 Table A1). In total, 68 species emerged from the semi-arid soil seed bank, 81 from the  
252 Mediterranean origin, and 53 species were shared between the two origins. Fourteen  
253 of these appeared in all four combinations of community origin and climate.

254

### 255 **Diversity, richness and biomass**

256 Total biomass, plant density, number of species and species diversity (Fig. 1b, 2a,  
257 b, Table 1) were all significantly higher for communities of M origin rather than SA  
258 origin. Additionally, for the M community origins, plant biomass, species richness,  
259 diversity (Fig. 1a, b, d) and total density (Fig 2.a, b) were significantly lower when  
260 communities were exposed to the drier SA climates compared to their home climate,  
261 whereas evenness remained the same across climates (Fig. 1c). For the SA  
262 community origins, climate had no significant effect on any of the whole community  
263 parameters total density (Fig. 2a, b, Table 2), biomass, species richness or diversity  
264 (Fig.1, Table 1). Higher evenness was found in SA community origins exposed to M  
265 climate compared to M community origins exposed to SA climate (Fig. 1c, Table 1).

266

### 267 **Relative abundance of CNG across sites and community origins**

268 Relative density of individuals changed considerably across community  
269 origins and CNG groups (Table 2). In particular, the relative abundance of CNGs  
270 shifted significantly across climates and community origins as indicated by the  
271 significant two-way interactions (Table 2, Fig. 2a-d, Supplementary Material  
272 Appendix 2 Table A2). In SA community origins, the mean abundance of individuals  
273 belonging to dry CNGs (CNG 1 and 2) was halved in M climate compared to SA

274 climate; on the other hand individuals belonging to CNG 4, the wettest adapted group,  
275 were 6.5 times more abundant in M climate (Fig. 2a, c). In M communities, the shift  
276 in CNG relative abundances was less strong but the relative hierarchical response of  
277 the CNGs was in the same order (densities of CNG1 and 2 higher in SA climate;  
278 CNG3 and 4 higher in M climate). The largest shift was seen in CNG4 that counted  
279 twice as many individuals in home vs. away from home climate (Fig. 2b, d). The  
280 different magnitude in CNG shifts across community origins and climates was  
281 confirmed by a significant 3-way interaction (CNG x community origin x climate,  
282 Table 2, Fig. 2e, f).

283 The RDA indicated four distinct communities emerging from the respective  
284 treatments, with a significant effect of community origin and climate on species  
285 assembly, as well as a significant interaction between these terms (Fig. 3a, b). Using  
286 simple correlations we assessed which plots/species scores changed and had most  
287 impact on each axis. We obtained three main RDA axes describing the species  
288 composition. For plot mean scores: RDA1 (9.2% explained) was highly correlated to  
289 overall differences between community origins, whereas the constrained RDA2  
290 (3.3%; explained) and RDA3 (1.7%; explained) distinguished the climate x  
291 community origin interaction term. For species mean scores, RDA1 was positively  
292 correlated to species Climatic Niche values, and the correlation was positive but less  
293 strong for RDA2 and RDA3 (Fig. 3c). Results were further validated by an RDA on  
294 the community weighted mean traits using species Climatic Niche values as a trait,  
295 and showed significant community origin and climate effects ( $p < 0.05$ ). In  
296 combination, these results suggest that rainfall niche strongly explained variation in  
297 species composition across treatments.

298

## 299        **Discussion**

300        Our results revealed that climate played a large role in determining the species  
301        assemblages in our whole community transplant experiment, and that such changes  
302        were predictably related to possible species-specific climatic adaptations. One of our  
303        most notable findings was that large shifts in species composition occurred when  
304        transplants were exposed to vastly different climates, whereas total community  
305        parameters such as biomass, density, and diversity remained remarkably stable.

306        Perhaps unsurprisingly, and as predicted from previous observations across the  
307        rainfall gradient (Tielbörger et al. 2014), communities establishing from the  
308        Mediterranean (M) origin soil had higher individual density and total biomass than  
309        semi-arid (SA) origins. This is also similar to other dryland systems, where rainfall  
310        acts as a limiting resource (Guo and Brown 1997, Cleland et al. 2013). Consistently,  
311        all four CNGs had higher densities of individuals establishing from the M origin  
312        compared to SA origin. However, the wetter species groups (CNG 3 & 4) were  
313        proportionally more represented in M community origins, and the drier species groups  
314        (CNG 1 & 2) were more abundant in SA community origins. This, consistently with  
315        the findings of Bilton et al. (2016), suggests that CNGs are representative of species  
316        rainfall requirements and possibly climatic adaptations at the different sites. All  
317        communities rapidly matched the concomitant climate with shifts in community  
318        composition across climates that were strikingly well explained by hierarchical  
319        switches in relative CNG abundances. Plants establishing from both community  
320        origins showed a relative increase of species assumed to be most dry adapted when  
321        exposed to the drier (SA) climate. Accordingly, wet adapted species were more  
322        abundant in both communities when exposed to the wetter (M) climate. Therefore,  
323        CNGs revealed species responses to short-term climate effects in a predictable way,

324 suggesting potential short-term selection mechanisms that act on the communities in  
325 response to yearly or extreme differences in rainfall.

326 Our most intriguing finding was that climate not only selected for predictable  
327 species groups, but that the community origins differed greatly in the magnitude of  
328 the community shifts. The SA origin, with the more variable rainfall regime – both  
329 between and within years (Tielbörger et al. 2014) – also experienced the greater shifts  
330 in community composition. This result matches other studies showing that  
331 communities from drier climates often have higher inter-annual turnover of species  
332 composition (Guo and Brown 1997, Cleland et al. 2013). Fascinatingly, the  
333 magnitude of the compositional shifts between transplanted community origins was  
334 inversely related to changes in total community parameters across climates. Namely,  
335 in SA community origins total density, biomass and species richness remained  
336 constant. Conversely, for the M origin transplants, which had smaller compositional  
337 shifts, total density, biomass and richness decreased when exposed to the drier SA  
338 climate. Large inter-annual variation in species abundances often leads to higher  
339 community stability across time (Bai et al. 2004, Grime et al. 2008). Similar patterns  
340 have been previously explained in plant community studies, albeit in a different  
341 context, by the portfolio effect (Doak et al. 1998, Schindler et al. 2015). The portfolio  
342 effect predicts that greater numbers of species in a community lead both  
343 mathematically and ecologically to a greater chance of asynchronous relationships  
344 forming year-to-year. Here we show, consistent with a previous study (Cleland et al.  
345 2013), that in the community with the lower species richness (SA origin), greater  
346 asynchrony and greater species turnover led to greater stability across climates. This  
347 asynchrony is not random, but directly linked to species-specific climatic adaptations.  
348 Thus, asynchronous shifts in relative abundance of species according to their climate

349 adaptations may allow for fast responses to year-to-year climatic variation in dryland  
350 annual communities (Abbott 2017).

351 In the short-term, high species turnover may assure community stability, by  
352 maintaining stable biomass and density, but in the long-term, such processes may also  
353 lead to greater resistance and stability of dry (SA) communities to rainfall fluctuations  
354 by favoring species adapted to more arid conditions. The high turnover is possible  
355 without immediate loss of species because in dryland environments subject to large  
356 year-to-year climatic variability, plants often display bet-hedging strategies such as  
357 long-lived seed banks and seed dormancy that can buffer against inter-annual  
358 fluctuations (Petrů and Tielbörger 2008, Tielbörger et al. 2012). Delayed germination  
359 of dormant seeds during unfavorable years decreases the risk of extinction over time  
360 and also promotes coexistence of species with different climatic requirements via  
361 storage effects (Chesson and Grubb 1990, Pake and Venable 1995). Interestingly, the  
362 findings from this short-term community transplant study are consistent with those of  
363 a parallel long-term experiment conducted at the M and SA sites (Tielbörger et al.  
364 2014), where community composition was monitored for 10 years in permanent plots  
365 receiving respectively ambient rainfall, experimental drought (-30% rainfall) or  
366 increased rainfall (+30% rainfall). Plant communities exposed to the long-term  
367 climate manipulation treatments showed no detectable long-term effect on total  
368 density, species richness and community biomass (Tielbörger et al. 2014). This  
369 unexpected community resistance may be attributable to the large variability in  
370 rainfall to which plant species in both community origins are pre-adapted (Tielbörger  
371 et al. 2014, Tomiolo et al. 2015). Also at the two time-scales, selection of species in  
372 relation to their CNG was observed (Bilton et al. 2016). However, while in the current  
373 study we found stronger short-term selection for SA origin communities, long-term



374 selection patterns were found to be weaker in SA and stronger for M communities  
375 (Bilton et al. 2016), suggesting that high inter-annual fluctuations result in stable  
376 composition in the long run, whereas low species turnover across years results in long  
377 term loss of wet-adapted species.

378 Finally, the observation of the community-level responses among climates  
379 prompts an interesting parallel with well-known concepts of population ecology. High  
380 environmental variability may select for a high degree of phenotypic plasticity (Sultan  
381 1987, Pratt and Mooney 2013, Lazaro-Nogal et al. 2015, Spence et al. 2016). Thus,  
382 when exposed to novel climates, individuals will display a large plasticity in adaptive  
383 traits (Reed et al. 2011, Liancourt et al. 2015, Mathiasen and Premoli 2016). A better  
384 match between the new trait value and the novel climate (Valladares et al. 2014)  
385 confers an adaptive advantage and may result in stable fitness across home and away  
386 environments, i.e. fitness homeostasis (Richards et al. 2006, Nicotra et al. 2010) and  
387 may eventually assure the persistence of a species in changing climates. We propose  
388 an analogy to that concept on a community level, where relative species abundances  
389 (rather than trait values) shift across years (and sites) in order to better match the  
390 current climate. Here, we show that the SA community origin, which is historically  
391 exposed to larger year-to-year climatic variability (Holzapfel et al. 2006, Tielbörger et  
392 al. 2014), experienced a greater compositional fluctuation (or "compositional  
393 plasticity"), and this led to greater "community homeostasis" (i.e. maintenance of  
394 stable density and biomass) across climates.

395 Our overall findings allow some careful conclusions about the potential  
396 response of these communities to climate change. It should be noted that the variation  
397 in rainfall experienced by the community origins in our study approximated the  
398 extremes of climatic variability at each site, but exceeded the decrease in rainfall

399 predicted by climate change scenarios for the next 50-80 years (Smiatek et al. 2011,  
400 Tomiolo et al. 2015). These results suggest that, as long as inter-annual climatic  
401 fluctuations keep within the limits of climatic variability commonly experienced by  
402 these communities, and rainy years that replenish the seed bank periodically occur,  
403 wet adapted species will persist within the communities. However, with increasing  
404 drought and unpredictability, communities are likely to experience species loss that  
405 will affect primarily species with high rainfall requirements (Tielbörger et al. 2014,  
406 Bilton et al. 2016). The similar results from the long-term experiment with our  
407 reciprocal transplant indicate that the latter may be a powerful complement to long-  
408 term field experiments. However, it should be noted that annual communities are  
409 particularly suited for this approach and the same may not hold for long-lived  
410 communities. Moreover, the fast response observed in our communities is uncommon  
411 compared to temperate systems, where a lag between shifts in climatic conditions and  
412 subsequent changes in community structure is often observed (Adler and Levine  
413 2007, Jones et al. 2016). This suggests a higher resistance and resilience of dryland  
414 ecosystems to extreme events compared to temperate ecosystems (Ruppert et al.  
415 2015).

416

417 **Declarations:** KT and ST developed the experimental design. ST set up the  
418 experiments and collected the data. MB and ST performed statistical analyses. ST  
419 wrote the first draft of the manuscript and all authors contributed substantially to  
420 revisions. We declare that we do not have conflicts of interest.

421

422 **Acknowledgements:** Jaime Kigel and Marcelo Sternberg provided logistic support.  
423 The Hebrew University of Jerusalem (Rehovot) kindly provided material for

424 fieldwork. We thank Jake Alexander for providing comments on a previous version of  
425 the manuscript. This study is part of the GLOWA Jordan River Project and was  
426 funded by the German Ministry of Education and Research (BMBF). Further support  
427 for MB and ST was obtained by the German Research Foundation (TI338\_12-1;  
428 TI338\_11-1; and TI338\_11-2; TI 338/15-1).

429

430

431

432

433

434

435

436 **References**

437

438 Abbott, R. E. et al. 2017. Portfolio effects, climate change, and the persistence of  
439 small populations: analyses on the rare plant *Saussurea weberi*. — *Ecology*  
440 98: 1071-1081.

441 Adler, P. B. and Levine, J. M. 2007. Contrasting relationships between precipitation  
442 and species richness in space and time. — *Oikos* 116: 221-232.

443 Alexander, J. M. et al. 2015. Novel competitors shape species' responses to climate  
444 change. — *Nature* 525: 515-518.

445 Alexander, J. M. et al. 2016. When climate reshuffles competitors: a call for  
446 experimental macroecology. — *Trends in Ecology and Evolution* 31: 831-841.

447 Allison, S. D. et al. 2013. Microbial abundance and composition influence litter  
448 decomposition response to environmental change. — *Ecology* 94: 714-725.

449 Alon, A. and Steinberger, Y. 1999. Response of the soil microbial biomass and  
450 nematode population to a wetting event in nitrogen-amended Negev desert  
451 plots. — *Biol. Fertility Soils* 30: 147-152.

452 Anderson, R. et al. 1982. Variability in the abundance of animal and plant species. —  
453 *Nature* 296: 245-248.

- 454 Ayres, E. et al. 2009. Home-field advantage accelerates leaf litter decomposition in  
455 forests. — *Soil Biol. Biochem.* 41: 606-610.
- 456 Bai, Y. et al. 2004. Ecosystem stability and compensatory effects in the Inner  
457 Mongolia grassland. — *Nature* 431: 181.
- 458 Barbosa, E. R. M. et al. 2014. Short-term effect of nutrient availability and rainfall  
459 distribution on biomass production and leaf nutrient content of savanna tree  
460 species. — *Plos One* 9:
- 461 Baskin, C. C. et al. 1993. Annual seed dormancy cycles in two desert winter annuals.  
462 — *J. Ecol.* 81: 551-556.
- 463 Bilton, M. C. et al. 2016. Climatic niche groups: A novel application of a common  
464 assumption predicting plant community response to climate change. —  
465 *Perspect. Plant Ecol. Evol. Syst.* 19: 61-69.
- 466 BioGIS 2012. Israel Biodiversity Information System [<http://www.biogis.huji.ac.il/>  
467 ]. p available at <http://www.biogis.huji.ac.il/>.
- 468 Blume-Werry, G. et al. 2016. Short-term climate change manipulation effects do not  
469 scale up to long-term legacies: effects of an absent snow cover on boreal forest  
470 plants. — *J. Ecol.* 104: 1638-1648.
- 471 Bonebrake, T. C. and Mastrandrea, M. D. 2010. Tolerance adaptation and  
472 precipitation changes complicate latitudinal patterns of climate change

- 473 impacts. — Proceedings of the National Academy of Sciences of the United  
474 States of America 107: 12581-12586.
- 475 Brown, J. H. et al. 2001. Regulation of diversity: maintenance of species richness in  
476 changing environments. — *Oecologia* 126: 321-332.
- 477 Casper, B. B. and Castelli, J. P. 2007. Evaluating plant-soil feedback together with  
478 competition in a serpentine grassland. — *Ecol. Lett.* 10: 394-400.
- 479 Chesson, P. L. and Grubb, P. 1990. Geometry, heterogeneity and competition in  
480 variable environments. — *Philosophical Transactions of the Royal Society of*  
481 *London B: Biological Sciences* 330: 165-173.
- 482 Cleland, E. E. et al. 2013. Sensitivity of grassland plant community composition to  
483 spatial vs. temporal variation in precipitation. — *Ecology* 94: 1687-1696.
- 484 Cohen, D. 1966. Optimizing reproduction in a randomly varying environment. — *J.*  
485 *Theor. Biol.* 12: 119-129.
- 486 Cubasch, U. et al. 1996. Estimates of climate change in Southern Europe derived from  
487 dynamical climate model output. — *Clim. Res.* 7: 129-149.
- 488 De Dato, G. D. et al. 2006. Effects of warmer and drier climate conditions on plant  
489 composition and biomass production in a Mediterranean shrubland  
490 community. — *Forest@* 3: 511-526.

- 491 Doak, D. F. et al. 1998. The statistical inevitability of stability-diversity relationships  
492 in community ecology. — *Am. Nat.* 151: 264-276.
- 493 Doblas-Miranda, E. et al. 2015. Reassessing global change research priorities in  
494 mediterranean terrestrial ecosystems: how far have we come and where do we  
495 go from here? — *Global Ecol. Biogeogr.* 24: 25-43.
- 496 Ellenberg, H. 1974. Indicator values of vascular plants in central Europe. — *Scripta*  
497 *Geobotanica* 9: 97.
- 498 Elmendorf, S. C. et al. 2015. Experiment, monitoring, and gradient methods used to  
499 infer climate change effects on plant communities yield consistent patterns. —  
500 *Proc. Natl. Acad. Sci. U.S.A.* 112: 448-452.
- 501 Emmett, B. A. et al. 2004. The response of soil processes to climate change: results  
502 from manipulation studies of shrublands across an environmental gradient. —  
503 *Ecosystems* 7: 625-637.
- 504 Fernandez-Going, B. M. et al. 2013. Climate interacts with soil to produce beta  
505 diversity in Californian plant communities. — *Ecology* 94: 2007-2018.
- 506 Forey, E. et al. 2010. Does disturbance drive the collapse of biotic interactions at the  
507 severe end of a diversity-biomass gradient? — *Plant Ecol.* 206: 287-295.
- 508 Fox, J. and Weisberg, S. 2011. *An R Companion to Applied Regression*. — Sage  
509 Publications.

- 510 Garcia, R. A. et al. 2014. Multiple Dimensions of Climate Change and Their  
511 Implications for Biodiversity. — *Science* 344:
- 512 García-Camacho, R. et al. 2017. Phylogenetic structure of annual plant communities  
513 along an aridity gradient. Interacting effects of habitat filtering and shifting  
514 plant–plant interactions. — *Isr. J. Plant Sci.* 1-13.
- 515 Garnier, E. et al. 2007. Assessing the effects of land-use change on plant traits,  
516 communities and ecosystem functioning in grasslands: a standardized  
517 methodology and lessons from an application to 11 European sites. — *Ann.*  
518 *Bot.* 99: 967-985.
- 519 Gilman, S. E. et al. 2010. A framework for community interactions under climate  
520 change. — *Trends Ecol. Evol.* 25: 325-331.
- 521 Gottfried, M. et al. 2012. Continent-wide response of mountain vegetation to climate  
522 change. — *Nature Clim. Change* 2: 111-115.
- 523 Grime, J. P. et al. 2008. Long-term resistance to simulated climate change in an  
524 infertile grassland. — *Proceedings of the National Academy of Sciences of the*  
525 *United States of America* 105: 10028-10032.
- 526 Guo, Q. and Brown, J. H. 1997. Interactions between winter and summer annuals in  
527 the Chihuahuan Desert. — *Oecologia* 111: 123-128.



- 528 Harrison, S. P. et al. 2015. Climate-driven diversity loss in a grassland community. —  
529 Proceedings of the National Academy of Sciences of the United States of  
530 America 112: 8672-8677.
- 531 Hobbs, R. J. et al. 2006. Novel ecosystems: theoretical and management aspects of  
532 the new ecological world order. — Global Ecol. Biogeogr. 15: 1-7.
- 533 Holzapfel, C. et al. 2006. Annual plant-shrub interactions along an aridity gradient. —  
534 Basic Appl. Ecol. 7: 268-279.
- 535 Jones, S. K. et al. 2016. Altered rainfall patterns increase forb abundance and richness  
536 in native tallgrass prairie. — Scientific Reports 6: 20120.
- 537 Lazaro-Nogal, A. et al. 2015. Environmental heterogeneity leads to higher plasticity  
538 in dry-edge populations of a semi-arid Chilean shrub: insights into climate  
539 change responses. — J. Ecol. 103: 338-350.
- 540 Lazzaro, A. et al. 2011. Field-scale transplantation experiment to investigate  
541 structures of soil bacterial communities at pioneering sites. — Appl. Environ.  
542 Microbiol. 77: 8241-8248.
- 543 Legendre, P. and Gallagher, E. D. 2001. Ecologically meaningful transformations for  
544 ordination of species data. — Oecologia 129: 271-280.
- 545 Legendre, P. et al. 2011. Testing the significance of canonical axes in redundancy  
546 analysis. — Methods Ecol. Evol. 2: 269-277.

- 547 Liancourt, P. et al. 2015. Leaf-trait plasticity and species vulnerability to climate  
548 change in a Mongolian steppe. — *Global Change Biol.* 21: 3489-3498.
- 549 Lindenmayer, D. B. et al. 2012. Value of long-term ecological studies. — *Austral*  
550 *Ecol.* 37: 745-757.
- 551 Link, S. O. et al. 2003. A reciprocal transplant experiment within a climatic gradient  
552 in a semiarid shrub-steppe ecosystem: effects on bunchgrass growth and  
553 reproduction, soil carbon, and soil nitrogen. — *Global Change Biol.* 9: 1097-  
554 1105.
- 555 Liu, D. et al. 2018. Species selection under long-term experimental warming and  
556 drought explained by climatic distributions. — *New Phytol.* 217: 1494-1506.
- 557 Macel, M. et al. 2007. Climate vs. soil factors in local adaptation of two common  
558 plant species. — *Ecology* 88: 424-433.
- 559 Maestre, F. T. et al. 2012. Plant species richness and ecosystem multifunctionality in  
560 global drylands. — *Science* 335: 214-218.
- 561 Maranon, T. and Bartolome, J. W. 1993. Reciprocal transplants of herbaceous  
562 communities between *Quercus agrifolia* woodland and adjacent grassland. —  
563 *J. Ecol.* 81: 673-682.

- 564 Mathiasen, P. and Premoli, A. C. 2016. Living on the edge: adaptive and plastic  
565 responses of the tree *Nothofagus pumilio* to a long-term transplant experiment  
566 predict rear-edge upward expansion. — *Oecologia* 181: 607-619.
- 567 Miranda, J. D. et al. 2011. Climatic change and rainfall patterns: effects on semi-arid  
568 plant communities of the Iberian Southeast. — *J. Arid Environ.* 75: 1302-  
569 1309.
- 570 Nicotra, A. B. et al. 2010. Plant phenotypic plasticity in a changing climate. —  
571 *Trends Plant Sci.* 15: 684-692.
- 572 Noy-Meir, I. 1973. Desert ecosystems: Environment and producers. — *Annu. Rev.*  
573 *Ecol. Syst.* 4: 25–51.
- 574 Oksanen, J. et al. 2015. *vegan*: Community ecology package.
- 575 Pake, C. E. and Venable, D. L. 1995. Is coexistence of Sonoran desert annuals  
576 mediated by temporal variability in reproductive success? — *Ecology* 76: 246-  
577 261.
- 578 Parmesan, C. and Hanley, M. E. 2015. Plants and climate change: complexities and  
579 surprises. — *Ann. Bot.* 116: 849-864.
- 580 Peñuelas, J. et al. 2007. Response of plant species richness and primary productivity  
581 in shrublands along a north–south gradient in Europe to seven years of

- 582 experimental warming and drought: reductions in primary productivity in the  
583 heat and drought year of 2003. — *Global Change Biol.* 13: 2563-2581.
- 584 Petru, M. and Tielbörger, K. 2008. Germination strategies of annual plants under  
585 changing climatic conditions: teasing apart local and regional effects. —  
586 *Oecologia* 155: 717-728.
- 587 Pratt, J. D. and Mooney, K. A. 2013. Clinal adaptation and adaptive plasticity in  
588 *Artemisia californica*: implications for the response of a foundation species to  
589 predicted climate change. — *Global Change Biol.* 19: 2454-2466.
- 590 R Development Core Team 2014. R: A language and environment for statistical  
591 computing. . — In: *Computing, R. F. f. S.* (ed).
- 592 Reed, T. E. et al. 2011. Interacting effects of phenotypic plasticity and evolution on  
593 population persistence in a changing climate. — *Conserv. Biol.* 25: 56-63.
- 594 Richards, C. L. et al. 2006. Jack of all trades, master of some? On the role of  
595 phenotypic plasticity in plant invasions. — *Ecol. Lett.* 9: 981-993.
- 596 Rinnan, R. et al. 2007. Fifteen years of climate change manipulations alter soil  
597 microbial communities in a subarctic heath ecosystem. — *Global Change*  
598 *Biol.* 13: 28-39.

- 599 Ruppert, J. C. et al. 2015. Quantifying drylands' drought resistance and recovery: the  
600 importance of drought intensity, dominant life history and grazing regime. —  
601 *Global Change Biol.* 21: 1258-1270.
- 602 Sala, O. E. and Lauenroth, W. K. 1982. Small rainfall events: an ecological role in  
603 semiarid regions. — *Oecologia* 53: 301-304.
- 604 Sardans, J. et al. 2008. Warming and drought alter C and N concentration, allocation  
605 and accumulation in a Mediterranean shrubland. — *Global Change Biol.* 14:  
606 2304-2316.
- 607 Schindler, D. E. et al. 2015. The portfolio concept in ecology and evolution. — *Front.*  
608 *Ecol. Environ.* 13: 257-263.
- 609 Shi, Z. et al. 2015. Evidence for long-term shift in plant community composition  
610 under decadal experimental warming. — *J. Ecol.* 103: 1131-1140.
- 611 Siewert, W. and Tielbörger, K. 2010. Dispersal-dormancy relationships in annual  
612 plants: putting model predictions to the test. — *Am. Nat.* 176: 490-500.
- 613 Smiatek, G. et al. 2011. High-resolution climate change simulations for the Jordan  
614 River area. — *J. Geophys. Res.-Atmos.* 116:
- 615 Spence, L. A. et al. 2016. Short-term manipulation of precipitation in Mongolian  
616 steppe shows vegetation influenced more by timing than amount of rainfall. —  
617 *J. Veg. Sci.* 27: 249-258.

- 618 Sultan, S. E. 1987. Evolutionary Implications of Phenotypic Plasticity in Plants. — In:  
619 Hecht, M. K. et al. (eds), *Evolutionary Biology: Volume 21*. Springer US, pp.  
620 127-178.
- 621 Thompson, P. L. et al. 2015. Warming induces synchrony and destabilizes  
622 experimental pond zooplankton metacommunities. — *Oikos* 124: 1171-1180.
- 623 Tielbörger, K. et al. 2012. Bet-hedging germination in annual plants: a sound  
624 empirical test of the theoretical foundations. — *Oikos* 121: 1860-1868.
- 625 Tielbörger, K. et al. 2014. Middle-Eastern plant communities tolerate 9 years of  
626 drought in a multi-site climate manipulation experiment. — *Nature*  
627 *Communications* 5:
- 628 Tilman, D. and Downing, J. A. 1994. Biodiversity and stability in grasslands. —  
629 *Nature* 367: 363-365.
- 630 Tilman, D. et al. 1998. Diversity-stability relationships: statistical inevitability or  
631 ecological consequence? — *The American Naturalist* 151: 277-282.
- 632 Tomiolo, S. et al. 2015. Separating the role of biotic interactions and climate in  
633 determining adaptive response of plants to climate change. — *Ecology* 96:  
634 1298-1308.

635 Valladares, F. et al. 2014. The effects of phenotypic plasticity and local adaptation on  
636 forecasts of species range shifts under climate change. — *Ecol. Lett.* 17: 1351-  
637 1364.

638 Venables, W. N. et al. 2002. *Modern Applied Statistics with S.* — Springer.

639 Waldrop, M. P. and Firestone, M. K. 2006. Response of microbial community  
640 composition and function to soil climate change. — *Microb. Ecol.* 52: 716-  
641 724.

642 Wetzel, P. R. et al. 2004. Use a reciprocal transplant study to measure the rate of plant  
643 community change in a tidal marsh along a salinity gradient. — *Wetlands* 24:  
644 879-890.

645 Williams, J. W. and Jackson, S. T. 2007. Novel climates, no-analog communities, and  
646 ecological surprises. — *Front. Ecol. Environ.* 5: 475-482.

647 Wu, Z. T. et al. 2012. Biogeochemical and ecological feedbacks in grassland  
648 responses to warming. — *Nat. Clim. Chang.* 2: 458-461.

649 Ziv, B. et al. 2014. Trends in rainfall regime over Israel, 1975–2010, and their  
650 relationship to large-scale variability. — *Regional Environmental Change* 14:  
651 1751-1764.

652

653

654

655 **Figures and tables**

656

657 **Table 1: Type III ANOVA table results for the models applied to individual density, species**

658 **richness, species diversity, evenness and total biomass. Lines correspond to response variables**

659 **and columns to explanatory variables of each model. In each column the first value represent**

660 **Chi-square test values and the second the p-value. Probability values for significant terms are**

661 **reported in bold.**

|                   | <b>Origin</b>            | <b>Climate</b>          | <b>Origin x Climate</b> |
|-------------------|--------------------------|-------------------------|-------------------------|
| Density           | 312.86; <b>&lt;0.001</b> | 0.12; 0.72              | 0.59; 0.44              |
| Species richness  | 281.29; <b>&lt;0.001</b> | 12.99; <b>&lt;0.001</b> | 0.085; 0.77             |
| Evenness          | 11.96; <b>&lt;0.001</b>  | 7.18; <b>0.009</b>      | 0.028; 0.86             |
| Species diversity | 130.41; <b>&lt;0.001</b> | 10.40; <b>0.001</b>     | 1.36; 0.24              |
| Total biomass     | 103.86; <b>0.001</b>     | 2.34; 0.13              | 4.66; <b>0.03</b>       |

662

663



664 **Table 2: Type III ANOVA table of results for Generalized Linear Models determining the effect**  
665 **of community origin, climate and Climatic Niche Group (CNG) on plant community densities**  
666 **establishing from seed banks. N=320.**

| Effect                    | DF | LR Chi-sq. | P-value            |
|---------------------------|----|------------|--------------------|
| Origin                    | 1  | 236.93     | <b>&lt;0.00001</b> |
| Climate                   | 1  | 2.35       | 0.12540            |
| CNG                       | 3  | 343.21     | <b>&lt;0.00001</b> |
| Origin x Climate          | 1  | 0.07       | 0.78714            |
| Origin x CNG              | 3  | 83.55      | <b>&lt;0.00001</b> |
| Climate x CNG             | 3  | 50.09      | <b>&lt;0.00001</b> |
| Origin x Climate x<br>CNG | 3  | 16.85      | <b>0.00076</b>     |

667

668

669

670

671

672

673

674

675

676

677

678

679

680

681

682

683 **Figure Captions:**

684 **Figure 1: Mean  $\pm$ 1SE A) species richness (i.e. number of species per plot), B) total biomass, C)**  
685 **evenness, D) diversity, of annual plant communities established from two community origins**  
686 **(‘M’ Mediterranean; ‘SA’ Semi-Arid) grown in two sites (i.e. climates: ‘M’ Mediterranean; ‘SA’**  
687 **Semi-Arid).**

688

689 **Figure 2: Impact of community origin, climate and Climatic Niche Group (CNG) on plant**  
690 **densities establishing from seed banks in home vs. away-from-home climate. Each Climatic Niche**  
691 **Group (CNG) aggregates species with similar climatic adaptation, ranging from dry climates**  
692 **(CNG 1) to wetter climates (CNG 4). Fig. 2 a, b: Total mean individuals density across climates is**  
693 **broken down according to CNG relative abundance. Fig. 2 c-f: Differences in relative densities of**  
694 **CNG groups are expressed as log ratios, where positive values indicate higher CNG relative**  
695 **abundances in SA community origins or sites, whereas negative values indicate higher CNG**  
696 **relative abundances in M community origins and climate. Community composition shifts are**  
697 **represented across community origins (2c), climates (2d) and the combination of the two (2 e,f).**

698

699

700 **Figure 3: Redundancy Analysis (RDA) of species compositional change in community origins**  
701 **emerging in home vs. away-from-home climates. Indicated are the 95% confidence intervals for**  
702 **the groupings/categories (ellipses). Fig. 3 a, b represents the plot centroids of each community**  
703 **origin-climate combination. Lines are vectors from the centre of a category to each site score**  
704 **(points). RDA-axis 1: correlated to distance between origins, RDA-axis 3: the effect of climate on**  
705 **SA community origins, and RDA-axis 2 the effect of climate on M community origins. In red: SA**  
706 **community origins - SA climate; yellow: SA origins - M climate; blue: M origins- M climate;**  
707 **green: M origins -SA climate. Fig. 3c represents the species centroids for each species group.**  
708 **Lines are vectors connecting the centre of each group with species scores. In red: CNG1, yellow:**  
709 **CNG2, green: CNG3, blue: CNG4.**

710

711

712

713

714

715

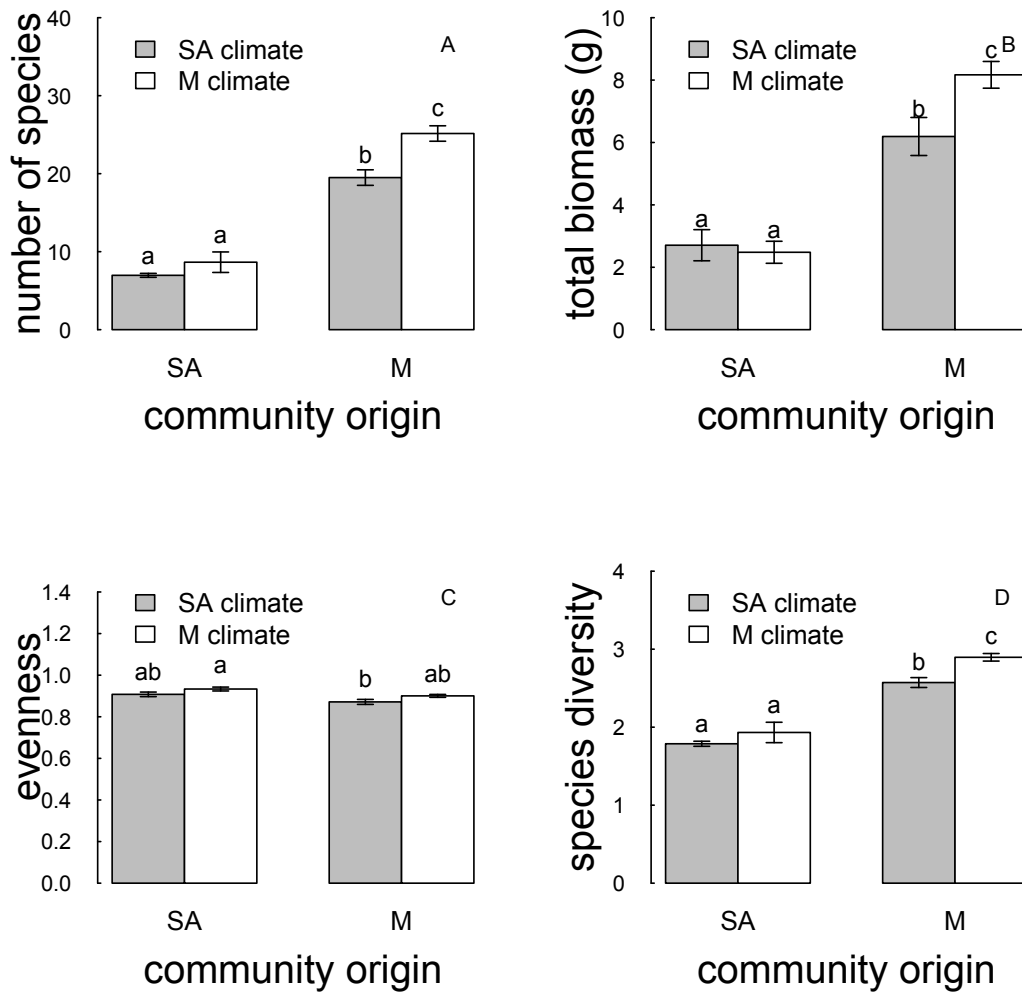

716  
717  
718

Figure 1

719  
720  
721

## Raw Density

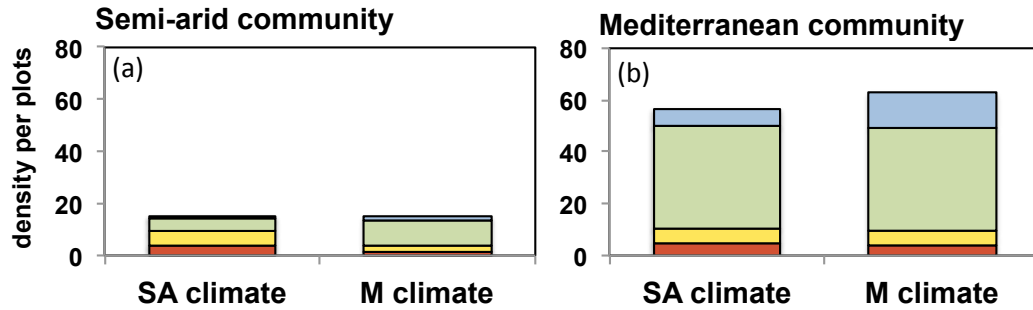

## 2-way interactions

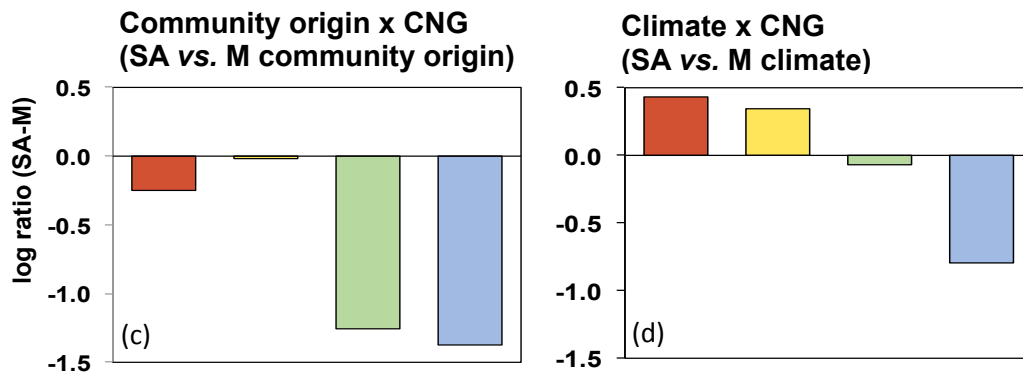

## 3-way interaction

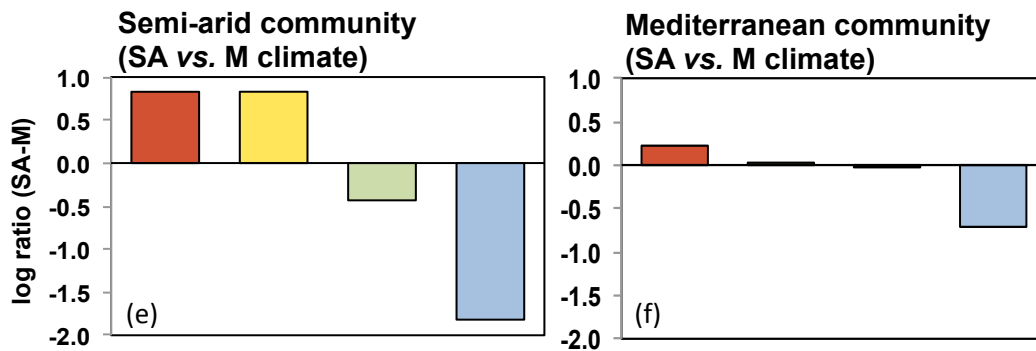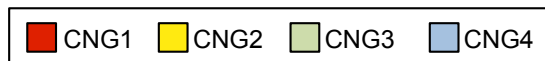

722  
723

Figure 2

724

725

726

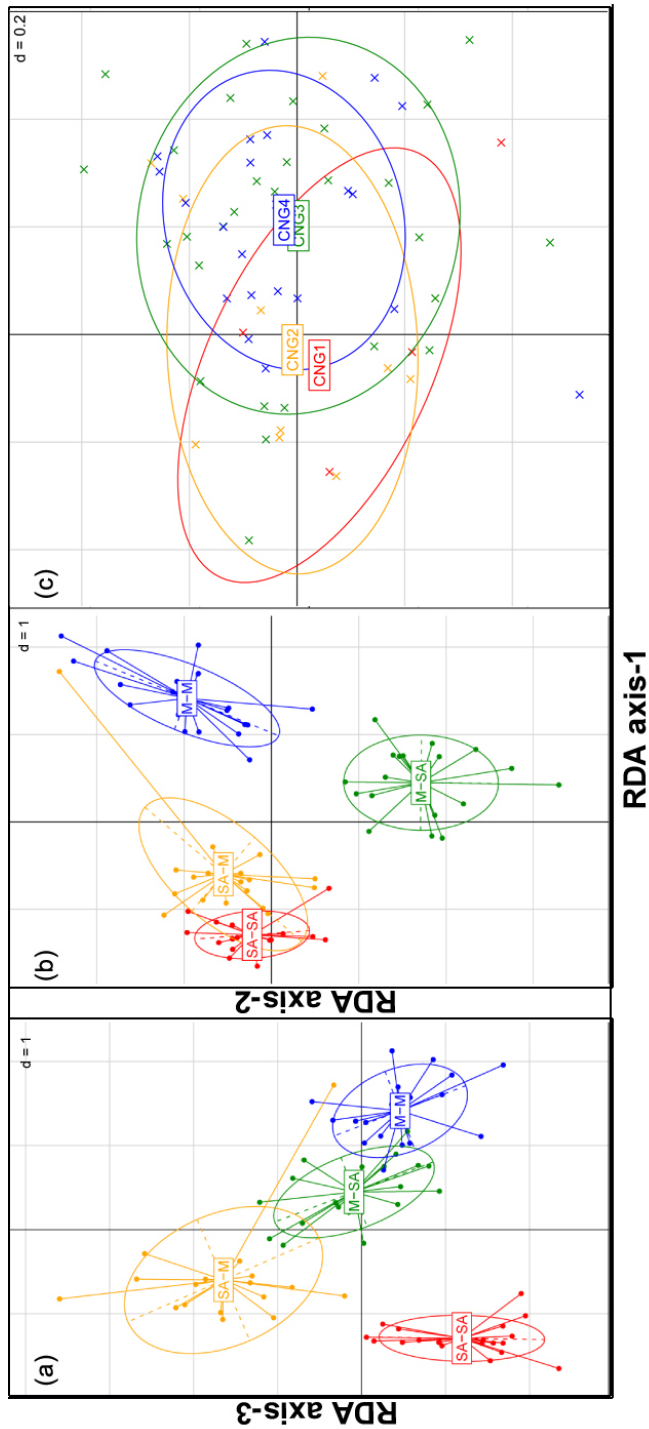

747

Figure 3

748

749

750

751
