1 **Whole plant community transplants across climates reveal structural community**  
2 **stability due to large shifts in species assemblage**

3

4 **Article type: original research**

5

6 Authors: Sara Tomiolo<sup>a,b\*</sup>, Mark C. Bilton<sup>a</sup>, Katja Tielbörger<sup>a</sup>

7 **Affiliation:**

8 a- Department of Ecology and Evolution, Plant Ecology Group, University of

9 Tübingen, Auf der Morgenstelle 5, 72076 Tübingen, Germany

10 b- Department of Bioscience, Aarhus University, Vejlsovej 25, 8600 Silkeborg,

11 Denmark

12 **Contacts:**

13 \*Corresponding author: [sara.tomiolo@gmail.com](mailto:sara.tomiolo@gmail.com); **Orcid ID:** [orcid.org/0000-0002-](https://orcid.org/0000-0002-5071-5851)  
14 5071-5851

15 Mark C. Bilton: [mcbilton.ecology@hotmail.com](mailto:mcbilton.ecology@hotmail.com)

16 Katja Tielbörger: [katja.tielboerger@uni-tuebingen.de](mailto:katja.tielboerger@uni-tuebingen.de)

17 **Running headline:** Community stability under climate change

18 **Keywords:** annual plant communities, climate change, Climatic Niche Groups,

19 community ecology, reciprocal transplants, determinants of plant community

20 diversity and assemblage, distribution range, community stability, field experiments

21

22

## 23 **Summary**

24

25 (1) Climate change will decrease precipitation and increase rainfall variability in  
26 Eastern Mediterranean regions, with responses of plant communities largely  
27 uncertain. Here, we tested short-term responses of dryland plant communities to  
28 contrasting rainfall regimes using a novel experimental approach.

29 (2) We exposed three annual plant communities to sharp changes in climatic  
30 conditions using whole community reciprocal transplants of soil and seed banks. We  
31 tested for the role of climate *vs.* community origin on community response and  
32 resistance. In parallel, we asked whether origin-specific climatic adaptations predict  
33 compositional shifts across climates.

34 (3) For both community origins, the most dry-adapted species in each community  
35 increased in dry climate and the wet-adapted species increased in wet climate. Dry  
36 community origins showed large compositional shifts while maintaining stable plant  
37 density, biomass and species richness across climates. Conversely, wet communities  
38 showed smaller compositional shifts, but larger variation in biomass and richness.

39 (4) Asynchrony in species abundances in response to rainfall variability could  
40 maintain structural community stability. This, in combination with seed dormancy,  
41 has the ability to delay extinction in response to climate change. However, increasing  
42 occurrence of extreme droughts may, in the long-term, lead to loss of wet-adapted  
43 species.

44

## 45        **Introduction**

46        Understanding how climate may alter overall available plant resources (Sardans *et*  
47 *al.*, 2008; Garcia *et al.*, 2014) and impact upon community structure (Tilman &  
48 Downing, 1994; Gilman *et al.*, 2010) is a major challenge in current ecological  
49 research (Maestre *et al.*, 2012; Parmesan & Hanley, 2015). In cold regions for  
50 example, warming is likely to improve growing conditions and thus increase plant  
51 community biomass by increasing nutrient mobilization and expanding the length of  
52 the growing season (Garcia *et al.*, 2014). In contrast, decreased rainfall in drier  
53 regions will likely have negative impacts on primary productivity, community  
54 composition, and their corresponding ecosystem services (Sala & Lauenroth, 1982;  
55 Peñuelas *et al.*, 2007; Miranda *et al.*, 2011). These effects may be particularly strong  
56 in those dryland ecosystems for which climate predictions indicate increasing  
57 incidents of droughts (Cubasch *et al.*, 1996; Smiatek *et al.*, 2011). Here, droughts and  
58 increasing temperatures will increase evapotranspiration, shorten the growing season  
59 and limit access to nutrients, thereby decreasing total community biomass (Peñuelas  
60 *et al.*, 2007; Doblas-Miranda *et al.*, 2015; Harrison *et al.*, 2015). In extreme cases,  
61 this may lead to the collapse of entire ecological communities (Forey *et al.*, 2010).

62        One of the predicted impacts of climate change is a re-assembly of plant  
63 communities (Hobbs *et al.*, 2006; Williams & Jackson, 2007; Alexander *et al.*, 2016)  
64 due to the differential ability of single species to either track their climatic niche or to  
65 survive under changed conditions, by means of adaptation or plasticity (Fernandez-  
66 Going *et al.*, 2013; Shi *et al.*, 2015). Such community reshuffling may be expressed in  
67 a loss or gain of certain species, a shift in species relative abundance or both. In plant  
68 communities already exposed to large inter-annual variations in climate, immediate  
69 rearrangement of community assembly in response to climate extremes may be an  
70 inherent property of plant communities, and may promote community stability in the  
71 long-term. This effect is particularly pronounced when species numbers are large and  
72 population sizes vary asynchronously (Doak *et al.*, 1998; Schindler *et al.*, 2015).  
73 Indeed, ecological theory and models support the idea that high inter-annual variation  
74 in species response to climate can lead to community-level stability (Anderson *et al.*,  
75 1982; Tilman *et al.*, 1998; Thompson *et al.*, 2015; Abbott *et al.*, 2017). This may be  
76 an important mechanism for maintaining dryland communities' stability in response to  
77 large year-to-year variation in rainfall, and for slowing down ongoing selection

78 processes due to climate change (Bonebrake & Mastrandrea, 2010; Bilton *et al.*,  
79 2016).

80 Although long-term climate manipulations are the gold standard in ecological  
81 climate impact research and are fundamental for understanding long-term community  
82 shifts (Brown *et al.*, 2001; Rinnan *et al.*, 2007; Blume-Werry *et al.*, 2016), they are  
83 very costly to set up and maintain, often outliving funding cycles and scientific  
84 research positions (Lindenmayer *et al.*, 2012). The monitoring of communities for  
85 short-term responses may be a useful complement to long-term experiments, as  
86 besides being less costly, it can be vitally important for parsing mechanistic  
87 information about plant responses to large inter-annual variation, as well as extreme  
88 events (De Dato *et al.*, 2006; Barbosa *et al.*, 2014; Blume-Werry *et al.*, 2016).  
89 Reciprocal transplants represent a promising approach for indirectly studying plant  
90 responses to climate change on a short temporal scale. These manipulative  
91 experiments have been widely adopted in single species (e.g. Link *et al.*, 2003; Casper  
92 & Castelli, 2007; Macel *et al.*, 2007; Alexander *et al.*, 2015; Tomiolo *et al.*, 2015) for  
93 studying local adaptation and, more recently, for studying their responses to a climate  
94 that matches conditions predicted by climate change scenarios (the so called "space-  
95 for-time approach"). Reciprocal transplants have also been applied to entire  
96 communities in studies of soil microbiomes (Waldrop & Firestone, 2006; Lazzaro *et al.*  
97 *et al.*, 2011), leaf litter (Ayres *et al.*, 2009; Allison *et al.*, 2013), and occasionally to  
98 whole plant communities in different habitats ranging from wetlands to alpine  
99 grasslands (Maranon & Bartolome, 1993; Wetzal *et al.*, 2004; Wu *et al.*, 2012;  
100 Alexander *et al.*, 2015). However, the potential for using whole community reciprocal  
101 transplants to study plant community response to climate change has not been fully  
102 exploited, particularly in dryland systems, which often provide ideal conditions.

103 Dryland ecosystems are often dominated by annual plants that survive the dry  
104 season as a permanent seed bank (Cohen, 1966). Therefore, the community (i.e. the  
105 seed bank) can be conveniently transplanted as a whole during the dry season without  
106 any damage to the plants. In addition, by transplanting seed banks with their  
107 associated soil, it is possible to evaluate plant communities' responses to climate  
108 while preserving soil abiotic and biotic interactions. To test the response of dryland  
109 annual plant communities characterized by very different climates, we transplanted  
110 home soil with seed bank among three sites situated along a steep aridity gradient in  
111 the Eastern Mediterranean region, ranging from arid to Mediterranean climate. In this

112 region, rainfall is the main limiting factor for plant growth (Ziv *et al.*, 2014) and  
113 differs up to eight-fold between the driest and wettest site (Holzapfel *et al.*, 2006). We  
114 classified species based on their climatic requirements, adopting the Climatic Niche  
115 Group approach (CNG; *sensu* Bilton *et al.* 2016) that has been successfully employed  
116 for the species in our study region (Bilton *et al.*, 2016) and in other dryland  
117 ecosystems (Liu *et al.*, 2018). By identifying those species responsive to drier or  
118 wetter conditions, this approach provided us with testable predictions about directions  
119 of shifts in community assembly across climates within the reciprocal transplants.  
120 Finally, the study sites used for our reciprocal transplant also hosted a long-term  
121 climate manipulation experiment (Tielbörger *et al.*, 2014). This allowed for a  
122 qualitative comparison between long-term dynamics, resulting from consistently  
123 imposed climate change, and the short-term responses observed in our transplant  
124 experiment.

125 We predicted that the community emerging from the reciprocal soil transplants  
126 would be greatly determined by community origin, with fewer individuals emerging  
127 from drier origins than wetter origins. Secondly, we hypothesized that, regardless of  
128 their origin, communities emerging at the drier transplant site (i.e. lower rainfall  
129 availability) would experience a reduction in total biomass and plant density. We also  
130 predicted that climate would select the emerging community from the species pool of  
131 each origin in a predictable manner, with more wet adapted species emerging when  
132 communities were exposed to wetter climates, and more dry-adapted species in drier  
133 climates.

134

## 135 **Methods**

### 136 **Study area**

137 This study was conducted in Israel at three fenced sites (area approximately 100 m  
138 x 400 m) with respectively Mediterranean (M), semi-arid (SA) and arid (A) climate.  
139 The three study sites share the same calcareous bedrock, southern aspect, altitude and  
140 mean annual temperatures, so that they differ chiefly in mean and variance of annual  
141 rainfall, and vegetation. The M site is located southwest of Jerusalem (N 31° 42' E  
142 35° 3') at 620 masl, on Terra Rossa soil. The climate is characterized by 550 mm  
143 average annual rainfall with 20% inter-annual variation. The SA site (N 31° 23' E 34°  
144 54') is located in the northern portion of the Negev Desert near the city of Beersheba,

145 at 590 masl, on Light Brown Rendzina. Average annual rainfall is 270 mm with  
146 approximately 30% inter-annual variation. The A site is located in the central Negev  
147 near Sde Boqer (N 30°52' E 34°46') at 470 masl, on desert Lithosol. Average annual  
148 rainfall amounts to 90 mm with 43% inter-annual variation (Holzapfel *et al.*, 2006).  
149 The plant communities at the three sites are semi-natural shrublands dominated by  
150 *Sarcopoterium spinosum* (L.) Spach, and winter annuals (approx. 85% of all species)  
151 that persist during summer in the form of dormant seed banks stored in the soil (Noy-  
152 Meir, 1973; Alon & Steinberger, 1999). The species pool is overlapping among sites,  
153 and annual plant cover amounts to 25% at the M site, 10% at the SA site, and < 1% at  
154 the A site (Tielbörger *et al.*, 2014).

### 155 **Experimental set up**

156 During summer of 2010, we collected soil with seed bank from forty square plots  
157 (20cm x 20cm, depth: 5cm) at the M and A sites and sixty plots at the SA site. Within  
158 each site, plots were situated at least 20 cm apart from each other, and away from  
159 rocks and shrubs. Following Tomiolo *et al.* (2015) soil collected from each site was  
160 pooled to produce a baseline community. Previous studies showed that small-scale  
161 heterogeneity in the soil seed bank may be very large, with some patches having  
162 almost no seeds and others very many (Siewert & Tielbörger, 2010). Therefore, we  
163 pooled the soil samples per site prior to the transplant, following the procedure  
164 adopted in many previous studies using field soil (Maranon & Bartolome, 1993;  
165 Macel *et al.*, 2007; Burns & Strauss, 2011; Lazzaro *et al.*, 2011).

166 The soil was stored in a net-house at the University of Rehovot, Israel, where it  
167 experienced summer temperatures necessary for breaking seed dormancy (Baskin *et al.*,  
168 1993). In September 2010, twenty of the previously excavated plots at each site  
169 were randomly selected and filled with home soil, while the remaining plots were  
170 filled with soil from the closest away-from-home site (i.e. M site received M and SA  
171 soil; SA site received M, SA and A soil; A site received SA and A soil,  
172 Supplementary Material Appendix 1 Fig. A1). Transplanted soil was separated from  
173 the surrounding soil by a layer of absorbent paper that provided initial isolation  
174 between soils, while not impeding water percolation. After transplanting, we placed  
175 patches of organza (a thin transparent fabric) over the surface of each plot to avoid  
176 contamination from seed dispersal or seed predation (Petrů & Tielbörger, 2008), and  
177 we removed them at the time of germination.

178 Because the transplants were carried out during the dormant season we could  
179 relocate the community of dormant seeds and soil biota with minimum damage. By  
180 transplanting communities with their maternal soil we could test direct effects of  
181 climate (e.g. decreasing rainfall) while preserving biotic interactions with  
182 neighbouring plants and soil biota, which are also affected by the novel climate  
183 (Emmett *et al.*, 2004). At peak development (spring 2011), we recorded the identity  
184 and number of individuals of the emerging species in each plot. In order to minimize  
185 edge effects, we excluded plants growing in the outer 1 cm margin of each plot. After  
186 species identification, aboveground biomass was collected, oven-dried at 70°C for 48  
187 hours and weighed.

188 Unfortunately, the season of recording was very dry and the arid site received  
189 only 30% of the average annual rainfall. Therefore, only a handful of seedlings of two  
190 desert species (*Stipa capensis*, *Erodium touchyanum*) emerged at the arid site. As a  
191 result, there was no home arid community to be compared to the transplants, and we  
192 had to restrict our subsequent analyses to the reciprocal transplants between the SA  
193 and M community origins.

194

### 195 **Climatic Niche Groups (CNG)**

196 Each species within the target communities was assigned to a Climatic Niche  
197 Group (Bilton *et al.*, 2016) classified by their distribution range in relation to rainfall.  
198 This approach has proven powerful for predicting species-specific response to climate  
199 change (Bilton *et al.*, 2016; Liu *et al.*, 2018). A similar method has been employed for  
200 defining thermal niches of species in high elevation and tundra habitats (Gottfried *et*  
201 *al.*, 2012; Elmendorf *et al.*, 2015), and it is conceptually similar to Ellenberg values,  
202 which determine species habitat requirements based on several abiotic parameters  
203 (Ellenberg, 1974).

204 The rationale for the CNG grouping is that rainfall is the main driver of  
205 community composition in the region, therefore species sharing similar climate  
206 adaptations (approximated by the realized climatic rainfall niche) are likely to co-  
207 occur in the same community (García-Camacho *et al.*, 2017). Species realized  
208 climatic niche values were derived as in Bilton *et al.* (2016). For each single species  
209 the observed occurrences within Israel (distribution range) were overlaid with mean  
210 annual rainfall climate data, and the mean value was taken (obtained from BioGIS,  
211 2012, available at <http://www.biogis.huji.ac.il/>). Boundaries between climatic niche

212 groups spanned similar ranges of average annual rainfall (approximately 130 mm) and  
213 resulted in four groups that ranked species with respect to their hypothesized response  
214 to climate. Climatic Niche Group 1 (CNG1) represented species associated with the  
215 lowest rainfall extremes of the gradient, conversely CNG4 gathered species  
216 distributed in areas with high rainfall. Species from all four CNGs were present in  
217 both communities (Supplementary Material, Appendix 2 Table A1), but varied in  
218 their proportional representation at each site, and could therefore be compared across  
219 sites and climates (Bilton *et al.*, 2016).

220

### 221 **Statistical analyses**

222 We first analyzed how total density (number of individuals per plot), total  
223 biomass, species richness (number of species per plot) and diversity (Shannon-Wiener  
224 Index) varied in response to climate, community origin and their interaction. In  
225 addition, we analyzed how the number of individuals belonging to each climatic niche  
226 group per plot (i.e. CNG density) varied in response to climate, community origin,  
227 with respect to the four-level categorical explanatory variable CNG identity (i.e.  
228 CNG1 – CNG4), including all two-way and three-way interactions. We applied  
229 generalized linear models with negative binomial distribution to total individual, CNG  
230 density and species richness using the MASS package (Venables *et al.*, 2002) within  
231 the R software version 3.3.3 (R Development Core Team, 2014). Biomass and species  
232 diversity were analyzed using linear models. To meet model requirements biomass  
233 square root transformed. The significance of the models was assessed with a Type 3  
234 ANOVA, using the “car” package (Fox & Weisberg, 2011).

235 Visual representation of the CNG density interactions was done using log-ratios  
236 calculated from the overall mean abundance of each group in each climate or origin.  
237 Showing relative change in overall abundances was also extremely helpful for  
238 visualizing the significant interactions we found with our models.

239 For testing how species composition varied with community origin and climate  
240 we used Redundancy Analysis (RDA, (Legendre *et al.*, 2011)) in the R package  
241 ‘vegan’ (Oksanen *et al.*, 2015). The interaction term was included in a full model and  
242 confirmed using a step-wise approach. The data were Hellinger transformed  
243 (Legendre & Gallagher, 2001) and scaled within plots. Significance of the model was  
244 tested using 999 permutations. To test if species composition could be explained by  
245 rainfall distribution range we regressed the resulting RDA ‘species mean scores’



246 against the ‘climatic niche value’ of each species, both for individual species and for  
247 the CNG classifications. Furthermore, we performed an RDA on the community-  
248 weighted means (Garnier *et al.*, 2007) using the species ‘climatic niche value’ as a  
249 pseudo-trait.

250

## 251 **Results**

252 Overall, 97 species were recorded in our transplant plots, among which 12.3%  
253 were grasses, 23.7% legumes and 64% belonged to other families (Supplementary  
254 Material, Appendix 2 Table A1). In total, 68 species emerged from the semi-arid soil  
255 seed bank, 81 from the Mediterranean origin, and 53 species were shared between the  
256 two origins. Fourteen of these appeared in all four combinations of community origin  
257 and climate.

258

### 259 **Total plant density, diversity, richness and biomass**

260 Number of species, species diversity, total plant density and total biomass (Fig. 1,  
261 Table 1) were all significantly higher for M community origins rather than SA  
262 origins. Additionally, M community origins attained significantly lower species  
263 richness and diversity and biomass (Fig. 1) when exposed to the drier SA climate  
264 compared to their home M climate. For the SA community origins, climate had no  
265 significant effect on total plant density, biomass, species richness or diversity (Fig.1,  
266 Table 1).

267

### 268 **Species composition**

269 The RDA indicated four distinct communities emerging from the respective  
270 treatments, with a significant effect of community origin and climate on species  
271 assembly, as well as a significant interaction between these terms (Fig. 2a, b). Using  
272 simple correlations we assessed which plots/species scores changed and had most  
273 impact on each axis. We obtained three main RDA axes describing the species  
274 composition. For plot mean scores, RDA1 (9.2% explained) was correlated to overall  
275 differences between community origins, whereas the constrained RDA2 (3.3%;  
276 explained) and RDA3 (1.7%; explained) distinguished the climate x community  
277 origin interaction term. For species mean scores, RDA1 was positively correlated to  
278 species Climatic Niche values, and the correlation was positive but less strong for

279 RDA2 and RDA3 (Fig. 2c). Results were further validated by an RDA on the  
280 community weighted mean traits using species Climatic Niche values as a trait, and  
281 showed significant community origin and climate effects ( $p < 0.05$ ). In combination,  
282 these results suggest that rainfall niche partially explained variation in species  
283 composition across treatments.

284

### 285 **CNG density across sites and community origins**

286 Overall, densities of individuals in each CNG group significantly differed  
287 (CNG identity effect: Fig. 3a, b, Table 2), and all group densities were higher in M  
288 origin than SA origin (Origin and Origin x CNG effect; Fig. 3c; Table 2). The  
289 representation of CNGs in the communities also changed significantly across  
290 climates, dry groups were more abundant in SA climate and wet groups were more  
291 abundant in M climate (Climate x CNG effect: Fig. 3c, Table 2, Supplementary  
292 Material Appendix 2 Table A2). The magnitude in CNG shifts across climates was  
293 different among community origins as indicated by a significant 3-way interaction  
294 (CNG identity x community origin x climate, Table 2, Fig. 3e, f). In SA community  
295 origins, the mean abundance of individuals belonging to dry CNGs (CNG 1 and 2)  
296 was halved in the wet (M) compared to the dry (SA) climate; on the other hand  
297 individuals belonging to CNG 4, the wettest adapted group, were 6.5 times more  
298 abundant in SA communities origins emerging in the wet climate (Fig. 3a, e). In M  
299 community origins, the shift in CNG densities across climates was less strong  
300 compared to SA origins, but the hierarchical response of the CNGs was in the same  
301 order (i.e. densities of dry CNGs were higher in the dry climate and densities of wet  
302 CNGs were higher in the wet climate). The largest shift in density was seen in the  
303 wettest CNG that counted twice as many individuals in wet vs. dry climate (Fig. 3b,  
304 f).

305

### 306 **Discussion**

307 Our results revealed that climate played a large role in determining the species  
308 assemblages in our whole community transplant experiment, and that such changes  
309 were predicted by species-specific climatic adaptations. One of our most notable  
310 findings was that the communities showed different qualitative and quantitative  
311 responses to climate change depending on their origin. Mediterranean community

312 origins from a wetter and more predictable climate, responded with changes in species  
313 richness, diversity and total biomass, but showed small shifts in community  
314 composition. Conversely, semi-arid community origins, from a drier and more  
315 unpredictable climate, showed little variation in species richness, diversity and  
316 biomass, and large shifts in species and CNG composition.

317 Perhaps unsurprisingly, and as predicted from previous observations across the  
318 rainfall gradient (Tielbörger *et al.*, 2014), communities establishing from the  
319 Mediterranean (M) origins had higher individual density and total biomass than semi-  
320 arid (SA) origins. This is also consistent with other dryland systems (Guo & Brown,  
321 1997; Cleland *et al.*, 2013). The higher plant density in Mediterranean community  
322 origins corresponded with higher densities of individuals for all CNG groups,  
323 Interestingly, the species composition and CNG abundances in the experimental  
324 communities rapidly matched the concomitant climate. Namely, plants establishing  
325 from both community origins showed a relative increase of dry adapted species (CNG  
326 1 and 2) when exposed to the drier (SA) climate. Similarly, wet adapted species  
327 (CNG 3 and 4) were more abundant in both communities when exposed to the wetter  
328 (M) climate. This response was particularly large for semi-arid community origins  
329 where the reshuffling in community composition was strikingly well explained by  
330 hierarchical switches in CNG abundances. Therefore, CNGs revealed species  
331 responses to short-term climate effects in a predictable way, suggesting potential  
332 short-term selection mechanisms (e.g. environmental filtering) that act on the  
333 communities in response to yearly differences in rainfall. This result is consistent with  
334 the findings of Bilton *et al.* (2016), and suggests that CNGs are representative of  
335 species rainfall requirements and possibly climatic adaptations at the different sites.

336 Our most intriguing finding was that climate filtered for predictable species  
337 groups, but the magnitude of the structural community shifts was largely different  
338 among community origins. In addition, the magnitude of the compositional shifts  
339 between transplanted community origins was inversely related to changes in total  
340 community parameters across climates. Mediterranean origin transplants, had smaller  
341 compositional shifts, but larger shifts in biomass and richness. Conversely, semi-arid  
342 community origins, with higher between- and within-year rainfall variability  
343 (Tielbörger *et al.*, 2014), experienced the greatest shifts in community composition,  
344 while showing only marginal response in community parameters. Consistent with our  
345 results, large interannual compositional shifts were observed also in other

346 communities from drier and highly variable climates (Guo & Brown, 1997; Cleland *et*  
347 *al.*, 2013). Interestingly, we did not record an increase in total biomass or total density  
348 in semi-arid community origins when exposed to wetter climates. This is possibly the  
349 result of an increase in wet CNGs in the communities, which have a core distribution  
350 in wetter regions where there are larger plant densities, productivity, and a higher  
351 intensity of competition (Schiffers & Tielbörger, 2006; Liancourt & Tielbörger,  
352 2009). Wet CNGs may possess a better competitive ability and might have curbed the  
353 growth and density of dry CNGs, thus leading to little changes in total biomass and  
354 total density.

355 Large inter-annual variation in species abundances in the short-term may lead to  
356 higher community stability in the long-term (Bai *et al.*, 2004; Grime *et al.*, 2008).  
357 Similar patterns have been previously explained in plant community studies, albeit in  
358 a different context, by the portfolio effect (Doak *et al.*, 1998; Schindler *et al.*, 2015).  
359 The portfolio effect predicts that greater numbers of species in a community lead both  
360 mathematically and ecologically to a greater chance of asynchronous relationships  
361 forming year-to-year. Here we show, consistent with previous studies (Cleland *et al.*,  
362 2013; Hallett *et al.*, 2014), that in the community originating in a more unpredictable  
363 climate (in our case the semi-arid community origin), greater asynchrony and greater  
364 species turnover led to greater stability across climates. Plant species in more variable  
365 climates have been found to exhibit a larger phenotypic plasticity (Sultan, 1987; Pratt  
366 & Mooney, 2013; Lazaro-Nogal *et al.*, 2015; Spence *et al.*, 2016), which results in  
367 fitness homeostasis (Richards *et al.*, 2006; Nicotra *et al.*, 2010). This could be an  
368 explanation for the higher resistance of species in SA communities but also reveals an  
369 interesting analogy with the community level, where ‘homeostasis’ may be associated  
370 with a larger compositional change. Overall, we suggest that asynchronous shifts in  
371 abundance of species according to their climate adaptations may allow for fast  
372 responses to year-to-year climatic variation in dryland annual communities (Abbott *et*  
373 *al.*, 2017).

374 In the short-term, high species turnover may assure community stability in  
375 biomass and density, but in the long-term, such processes may also lead to greater  
376 resistance and stability of dry communities to rainfall fluctuations by favoring species  
377 adapted to arid conditions. This high turnover is possible without immediate loss of  
378 species because in dryland environments, plants often display bet-hedging strategies  
379 such as long-lived seed banks and seed dormancy that can buffer against inter-annual

380 fluctuations (Petrů & Tielbörger, 2008; Tielbörger *et al.*, 2012). Delayed germination  
381 of dormant seeds during unfavorable years decreases the risk of extinction over time  
382 and also promotes coexistence of species with different climatic requirements via  
383 storage effects (Chesson & Grubb, 1990; Pake & Venable, 1995). Interestingly, the  
384 findings from this short-term community transplant study are consistent with those of  
385 a parallel long-term experiment conducted at the same study sites (Tielbörger *et al.*,  
386 2014), where community composition was monitored for 10 years in permanent plots  
387 receiving respectively ambient rainfall, experimental drought (-30% rainfall) or  
388 increased rainfall (+30% rainfall). Plant communities exposed to the long-term  
389 climate manipulation treatments showed no detectable long-term effect on total  
390 density, species richness and community biomass (Tielbörger *et al.*, 2014). However,  
391 at both time-scales, shifts in species abundance in relation to their CNG was observed  
392 (Bilton *et al.*, 2016). While in our short-term study we found these effects to be more  
393 pronounced for semi-arid community origins, the long-term study found stronger  
394 patterns in Mediterranean communities (Bilton *et al.*, 2016). This suggests that high  
395 inter-annual community fluctuations may contribute to stability in community  
396 composition in the long run, whereas low species turnover across years may result in  
397 long-term loss of wet-adapted species.

398 Our overall findings allow some careful conclusions about the potential  
399 response of these communities to climate change. It should be noted that the variation  
400 in rainfall experienced by the community origins in our study approximated the  
401 extremes of climatic variability at each site, but exceeded the decrease in rainfall  
402 predicted by climate change scenarios for the next 50-80 years (Smiatek *et al.*, 2011;  
403 Tomiolo *et al.*, 2015). These results suggest that, as long as inter-annual climatic  
404 fluctuations keep within the limits of climatic variability commonly experienced by  
405 these communities, and rainy years that replenish the seed bank periodically occur,  
406 wet adapted species will persist within the communities. However, with increasing  
407 drought and unpredictability, communities are likely to experience species loss that  
408 will affect primarily species with high rainfall requirements (Tielbörger *et al.*, 2014;  
409 Bilton *et al.*, 2016). The similarity of results between the long-term experiment and  
410 our reciprocal transplant indicate that the latter may be a powerful complement to  
411 long-term field experiments. However, annual communities are particularly suited for  
412 our experimental approach and the same may not hold for long-lived communities.  
413 For example, in temperate systems a lag between shifts in climatic conditions and

414 subsequent changes in community structure is often observed (Adler & Levine, 2007;  
415 Jones *et al.*, 2016). The unexpected community resistance and resilience of dryland  
416 ecosystems to extreme events compared with temperate ecosystems (Ruppert *et al.*,  
417 2015), may be attributable to the large variability in rainfall to which plant species are  
418 pre-adapted via bet hedging strategies (Tielbörger *et al.*, 2012; Gremer & Venable,  
419 2014) or enhanced phenotypic plasticity (Petrů *et al.*, 2006). Such differences among  
420 rainfall variability and plant life history should be taken into account when drawing  
421 comparisons among habitats.

422

423 **Declarations:** KT and ST developed the experimental design. ST set up the  
424 experiments and collected the data. MB and ST performed statistical analyses. ST  
425 wrote the first draft of the manuscript and all authors contributed substantially to the  
426 following versions. We declare that we do not have conflicts of interest.

427

428 **Acknowledgements:** Jaime Kigel and Marcelo Sternberg provided logistic support.  
429 The Hebrew University of Jerusalem (Rehovot) kindly provided material for  
430 fieldwork. We thank Jake Alexander for providing comments on a previous version of  
431 the manuscript. This study is part of the GLOWA Jordan River Project and was  
432 funded by the German Ministry of Education and Research (BMBF). Further support  
433 for MB and ST was obtained by the German Research Foundation (TI338\_12-1;  
434 TI338\_11-1; and TI338\_11-2; TI 338/15-1).

435

436 **Data Accessibility:** upon publication data will be made accessible on Dryad

437

438

#### 439 **References**

440

441 **Abbott RE, Doak DF, Peterson ML. 2017.** Portfolio effects, climate change, and the  
442 persistence of small populations: analyses on the rare plant *Saussurea weberi*.  
443 *Ecology* **98**(4): 1071-1081.

- 444 **Adler PB, Levine JM. 2007.** Contrasting relationships between precipitation and  
445 species richness in space and time. *Oikos* **116**(2): 221-232.
- 446 **Alexander JM, Diez JM, Hart SP, Levine JM. 2016.** When climate reshuffles  
447 competitors: a call for experimental macroecology. *Trends in Ecology and*  
448 *Evolution* **31**(11): 831-841.
- 449 **Alexander JM, Diez JM, Levine JM. 2015.** Novel competitors shape species'  
450 responses to climate change. *Nature* **525**(7570): 515-518.
- 451 **Allison SD, Lu Y, Weihe C, Goulden ML, Martiny AC, Treseder KK, Martiny**  
452 **JB. 2013.** Microbial abundance and composition influence litter  
453 decomposition response to environmental change. *Ecology* **94**(3): 714-725.
- 454 **Alon A, Steinberger Y. 1999.** Response of the soil microbial biomass and nematode  
455 population to a wetting event in nitrogen-amended Negev desert plots. *Biology*  
456 *and Fertility of Soils* **30**(1-2): 147-152.
- 457 **Anderson R, Gordon D, Crawley M, Hassell M. 1982.** Variability in the abundance  
458 of animal and plant species. *Nature* **296**(5854): 245-248.
- 459 **Ayres E, Steltzer H, Simmons BL, Simpson RT, Steinweg JM, Wallenstein MD,**  
460 **Mellor N, Parton WJ, Moore JC, Wall DH. 2009.** Home-field advantage  
461 accelerates leaf litter decomposition in forests. *Soil Biology and Biochemistry*  
462 **41**(3): 606-610.

- 463 **Bai Y, Han X, Wu J, Chen Z, Li L. 2004.** Ecosystem stability and compensatory  
464 effects in the Inner Mongolia grassland. *Nature* **431**(7005): 181.
- 465 **Barbosa ERM, Tomlinson KW, Carvalheiro LG, Kirkman K, de Bie S, Prins**  
466 **HHT, van Langevelde F. 2014.** Short-term effect of nutrient availability and  
467 rainfall distribution on biomass production and leaf nutrient content of  
468 savanna tree species. *PloS ONE* **9**(3).
- 469 **Baskin CC, Chesson PL, Baskin JM. 1993.** Annual seed dormancy cycles in two  
470 desert winter annuals. *Journal of Ecology* **81**: 551-556.
- 471 **Bilton MC, Metz J, Tielbörger K. 2016.** Climatic niche groups: A novel application  
472 of a common assumption predicting plant community response to climate  
473 change. *Perspectives in Plant Ecology, Evolution and Systematics* **19**: 61-69.
- 474 **BioGIS 2012.** Israel Biodiversity Information System [  
475 <http://www.biogis.huji.ac.il/> ]. available at  
476 <http://www.biogis.huji.ac.il/>.
- 477 **Blume-Werry G, Kreyling J, Laudon H, Milbau A. 2016.** Short-term climate  
478 change manipulation effects do not scale up to long-term legacies: effects of  
479 an absent snow cover on boreal forest plants. *Journal of Ecology* **104**(6):  
480 1638-1648.
- 481 **Bonebrake TC, Mastrandrea MD. 2010.** Tolerance adaptation and precipitation  
482 changes complicate latitudinal patterns of climate change impacts.



- 483 *Proceedings of the National Academy of Sciences of the United States of*  
484 *America* **107**(28): 12581-12586.
- 485 **Brown JH, Morgan Ernest SK, Parody JM, Haskell JP. 2001.** Regulation of  
486 diversity: maintenance of species richness in changing environments.  
487 *Oecologia* **126**: 321-332.
- 488 **Burns JH, Strauss SY. 2011.** More closely related species are more ecologically  
489 similar in an experimental test. *Proceedings of the National Academy of*  
490 *Sciences* **108**(13): 5302-5307.
- 491 **Casper BB, Castelli JP. 2007.** Evaluating plant-soil feedback together with  
492 competition in a serpentine grassland. *Ecology Letters* **10**(5): 394-400.
- 493 **Chesson PL, Grubb P. 1990.** Geometry, heterogeneity and competition in variable  
494 environments. *Philosophical Transactions of the Royal Society of London B:*  
495 *Biological Sciences* **330**(1257): 165-173.
- 496 **Cleland EE, Collins SL, Dickson TL, Farrer EC, Gross KL, Gherardi LA,**  
497 **Hallett LM, Hobbs RJ, Hsu JS, Turnbull L, et al. 2013.** Sensitivity of  
498 grassland plant community composition to spatial vs. temporal variation in  
499 precipitation. *Ecology* **94**(8): 1687-1696.
- 500 **Cohen D. 1966.** Optimizing reproduction in a randomly varying environment.  
501 *Journal of Theoretical Biology* **12**: 119-129.

- 502 **Cubasch U, vonStorch H, Waszkewitz J, Zorita E. 1996.** Estimates of climate  
503 change in Southern Europe derived from dynamical climate model output.  
504 *Climate Research* 7(2): 129-149.
- 505 **De Dato GD, Pellizzaro G, Cesaraccio C, Sirca CB, De Angelis P, Duce P, Spano**  
506 **DEI, Scarascia Mugnozza G. 2006.** Effects of warmer and drier climate  
507 conditions on plant composition and biomass production in a Mediterranean  
508 shrubland community. *Forest@* 3(4): 511-526.
- 509 **Doak DF, Bigger D, Harding EK, Marvier MA, O'Malley RE, Thomson D. 1998.**  
510 The statistical inevitability of stability-diversity relationships in community  
511 ecology. *American Naturalist* 151(3): 264-276.
- 512 **Doblas-Miranda E, Martínez-Vilalta J, Lloret F, Álvarez A, Ávila A, Bonet F,**  
513 **Brotos L, Castro J, Curiel Yuste J, Díaz M. 2015.** Reassessing global  
514 change research priorities in mediterranean terrestrial ecosystems: how far  
515 have we come and where do we go from here? *Global Ecology and*  
516 *Biogeography* 24(1): 25-43.
- 517 **Ellenberg H. 1974.** Indicator values of vascular plants in central Europe. *Scripta*  
518 *Geobotanica* 9: 97.
- 519 **Elmendorf SC, Henry GHR, Hollister RD, Fosaa AM, Gould WA, Hermanutz L,**  
520 **Hofgaard A, Jónsdóttir IS, Jorgenson JC, Lévesque E, et al. 2015.**  
521 Experiment, monitoring, and gradient methods used to infer climate change

- 522 effects on plant communities yield consistent patterns. *Proceedings of the*  
523 *National Academy of Sciences* **112**(2): 448-452.
- 524 **Emmett BA, Beier C, Estiarte M, Tietema A, Kristensen HL, Williams D,**  
525 **Penuelas J, Schmidt I, Sowerby A. 2004.** The response of soil processes to  
526 climate change: results from manipulation studies of shrublands across an  
527 environmental gradient. *Ecosystems* **7**(6): 625-637.
- 528 **Fernandez-Going BM, Harrison SP, Anacker BL, Safford HD. 2013.** Climate  
529 interacts with soil to produce beta diversity in Californian plant communities.  
530 *Ecology* **94**(9): 2007-2018.
- 531 **Forey E, Touzard B, Michalet R. 2010.** Does disturbance drive the collapse of biotic  
532 interactions at the severe end of a diversity-biomass gradient? *Plant Ecology*  
533 **206**(2): 287-295.
- 534 **Fox J, Weisberg S. 2011.** *An R Companion to Applied Regression*. Thousand Oaks  
535 CA: Sage Publications.
- 536 **Garcia RA, Cabeza M, Rahbek C, Araújo MB. 2014.** Multiple Dimensions of  
537 Climate Change and Their Implications for Biodiversity. *Science* **344**(6183).
- 538 **García-Camacho R, Metz J, Bilton MC, Tielbörger K. 2017.** Phylogenetic  
539 structure of annual plant communities along an aridity gradient. Interacting  
540 effects of habitat filtering and shifting plant–plant interactions. *Israel Journal*  
541 *of Plant Sciences*: 1-13.

- 542 **Garnier E, Lavorel S, Ansquer P, Castro H, Cruz P, Dolezal J, Eriksson O,**  
543 **Fortunel C, Freitas H, Golodets C, et al. 2007.** Assessing the effects of land-  
544 use change on plant traits, communities and ecosystem functioning in  
545 grasslands: a standardized methodology and lessons from an application to 11  
546 European sites. *Annals of Botany* **99**(5): 967-985.
- 547 **Gilman SE, Urban MC, Tewksbury J, Gilchrist GW, Holt RD. 2010.** A  
548 framework for community interactions under climate change. *Trends in*  
549 *Ecology & Evolution* **25**(6): 325-331.
- 550 **Gottfried M, Pauli H, Futschik A, Akhalkatsi M, Barancok P, Benito Alonso JL,**  
551 **Coldea G, Dick J, Erschbamer B, Fernandez Calzado MR, et al. 2012.**  
552 Continent-wide response of mountain vegetation to climate change. *Nature*  
553 *Clim. Change* **2**(2): 111-115.
- 554 **Gremer JR, Venable DL. 2014.** Bet hedging in desert winter annual plants: optimal  
555 germination strategies in a variable environment. *Ecology Letters* **17**(3): 380-  
556 387.
- 557 **Grime JP, Fridley JD, Askew AP, Thompson K, Hodgson JG, Bennett CR. 2008.**  
558 Long-term resistance to simulated climate change in an infertile grassland.  
559 *Proceedings of the National Academy of Sciences of the United States of*  
560 *America* **105**(29): 10028-10032.
- 561 **Guo Q, Brown JH. 1997.** Interactions between winter and summer annuals in the  
562 Chihuahuan Desert. *Oecologia* **111**(1): 123-128.

- 563 **Hallett LM, Hsu JS, Cleland EE, Collins SL, Dickson TL, Farrer EC, Gherardi**  
564 **LA, Gross KL, Hobbs RJ, Turnbull L, et al. 2014.** Biotic mechanisms of  
565 community stability shift along a precipitation gradient. *Ecology* **95**(6): 1693-  
566 1700.
- 567 **Harrison SP, Gornish ES, Copeland S. 2015.** Climate-driven diversity loss in a  
568 grassland community. *Proceedings of the National Academy of Sciences of the*  
569 *United States of America* **112**(28): 8672-8677.
- 570 **Hobbs RJ, Arico S, Aronson J, Baron JS, Bridgewater P, Cramer VA, Epstein**  
571 **PR, Ewel JJ, Klink CA, Lugo AE, et al. 2006.** Novel ecosystems: theoretical  
572 and management aspects of the new ecological world order. *Global Ecology*  
573 *and Biogeography* **15**(1): 1-7.
- 574 **Holzapfel C, Tielbörger K, Parag HA, Kigel J, Sternberg M. 2006.** Annual plant-  
575 shrub interactions along an aridity gradient. *Basic and Applied Ecology* **7**:  
576 268-279.
- 577 **Jones SK, Collins SL, Blair JM, Smith MD, Knapp AK. 2016.** Altered rainfall  
578 patterns increase forb abundance and richness in native tallgrass prairie.  
579 *Scientific Reports* **6**: 20120.
- 580 **Lazaro-Nogal A, Matesanz S, Godoy A, Perez-Trautman F, Gianoli E,**  
581 **Valladares F. 2015.** Environmental heterogeneity leads to higher plasticity in  
582 dry-edge populations of a semi-arid Chilean shrub: insights into climate  
583 change responses. *Journal of Ecology* **103**(2): 338-350.

- 584 **Lazzaro A, Gauer A, Zeyer J. 2011.** Field-scale transplantation experiment to  
585 investigate structures of soil bacterial communities at pioneering sites. *Applied*  
586 *and Environmental Microbiology* **77**(23): 8241-8248.
- 587 **Legendre P, Gallagher ED. 2001.** Ecologically meaningful transformations for  
588 ordination of species data. *Oecologia* **129**(2): 271-280.
- 589 **Legendre P, Oksanen J, ter Braak CJF. 2011.** Testing the significance of canonical  
590 axes in redundancy analysis. *Methods in Ecology and Evolution* **2**(3): 269-  
591 277.
- 592 **Liancourt P, Tielbörger K. 2009.** Competition and a short growing season lead to  
593 ecotypic differentiation at the two extremes of the ecological range.  
594 *Functional Ecology* **23**(2): 397-404.
- 595 **Lindenmayer DB, Likens GE, Andersen A, Bowman D, Bull CM, Burns E,**  
596 **Dickman CR, Hoffmann AA, Keith DA, Liddell MJ. 2012.** Value of long-  
597 term ecological studies. *Austral Ecology* **37**(7): 745-757.
- 598 **Link SO, Smith JL, Halvorson JJ, Bolton H. 2003.** A reciprocal transplant  
599 experiment within a climatic gradient in a semiarid shrub-steppe ecosystem:  
600 effects on bunchgrass growth and reproduction, soil carbon, and soil nitrogen.  
601 *Global Change Biology* **9**(7): 1097-1105.
- 602 **Liu D, Peñuelas J, Ogaya R, Estiarte M, Tielbörger K, Slowik F, Yang X, Bilton**  
603 **MC. 2018.** Species selection under long-term experimental warming and

604 drought explained by climatic distributions. *New Phytologist* **217**(4): 1494-  
605 1506.

606 **Macel M, Lawson CS, Mortimer SR, Smilauerova M, Bischoff A, Cremieux L,**  
607 **Dolezal J, Edwards AR, Lanta V, Bezemer TM, et al. 2007.** Climate vs.  
608 soil factors in local adaptation of two common plant species. *Ecology* **88**(2):  
609 424-433.

610 **Maestre FT, Quero JL, Gotelli NJ, Escudero A, Ochoa V, Delgado-Baquerizo M,**  
611 **Garcia-Gomez M, Bowker MA, Soliveres S, Escolar C, et al. 2012.** Plant  
612 species richness and ecosystem multifunctionality in global drylands. *Science*  
613 **335**: 214-218.

614 **Maranon T, Bartolome JW. 1993.** Reciprocal transplants of herbaceous  
615 communities between *Quercus agrifolia* woodland and adjacent grassland.  
616 *Journal of Ecology* **81**(4): 673-682.

617 **Miranda JD, Armas C, Padilla FM, Pugnaire FI. 2011.** Climatic change and  
618 rainfall patterns: effects on semi-arid plant communities of the Iberian  
619 Southeast. *Journal of Arid Environments* **75**(12): 1302-1309.

620 **Nicotra AB, Atkin OK, Bonser SP, Davidson AM, Finnegan EJ, Mathesius U,**  
621 **Poot P, Purugganan MD, Richards CL, Valladares F, et al. 2010.** Plant  
622 phenotypic plasticity in a changing climate. *Trends in Plant Science* **15**(12):  
623 684-692.

624 **Noy-Meir I. 1973.** Desert ecosystems: Environment and producers. *Annual Review of*  
625 *Ecology and Systematics* **4**: 25–51.

626 **Oksanen J, Blanchet FG, Kindt R, Legendre P, Minchin PR, O'Hara RB,**  
627 **Simpson GL, Solymos P, Henry M, Stevens H, et al. 2015.** vegan:  
628 Community ecology package.

629 **Pake CE, Venable DL. 1995.** Is coexistence of Sonoran desert annuals mediated by  
630 temporal variability in reproductive success? *Ecology* **76**: 246-261.

631 **Parmesan C, Hanley ME. 2015.** Plants and climate change: complexities and  
632 surprises. *Annals of Botany* **116**(6): 849-864.

633 **Peñuelas J, Prieto P, Beier C, Cesaraccio C, De Angelis P, De Dato G, Emmett**  
634 **BA, Estiarte M, Garadnai J, Gorissen A. 2007.** Response of plant species  
635 richness and primary productivity in shrublands along a north–south gradient  
636 in Europe to seven years of experimental warming and drought: reductions in  
637 primary productivity in the heat and drought year of 2003. *Global Change*  
638 *Biology* **13**(12): 2563-2581.

639 **Petrů M, Tielbörger K. 2008.** Germination strategies of annual plants under  
640 changing climatic conditions: teasing apart local and regional effects.  
641 *Oecologia* **155**: 717-728.



- 642 **Petrů M, Tielbörger K, Belkin R, Sternberg M, Jeltsch F. 2006.** Life history  
643 variation in an annual plant under two opposing environmental constraints  
644 along an aridity gradient. *Ecography* **29**(1): 66-74.
- 645 **Pratt JD, Mooney KA. 2013.** Clinal adaptation and adaptive plasticity in *Artemisia*  
646 *californica*: implications for the response of a foundation species to predicted  
647 climate change. *Global Change Biology* **19**(8): 2454-2466.
- 648 **R Development Core Team 2014.** R: A language and environment for statistical  
649 computing. .In Computing RFFS. Vienna, Austria.
- 650 **Richards CL, Bossdorf O, Muth NZ, Gurevitch J, Pigliucci M. 2006.** Jack of all  
651 trades, master of some? On the role of phenotypic plasticity in plant invasions.  
652 *Ecology Letters* **9**(8): 981-993.
- 653 **Rinnan R, Michelsen A, Baath E, Jonasson S. 2007.** Fifteen years of climate  
654 change manipulations alter soil microbial communities in a subarctic heath  
655 ecosystem. *Global Change Biology* **13**(1): 28-39.
- 656 **Ruppert JC, Harmoney K, Henkin Z, Snyman HA, Sternberg M, Willms W,**  
657 **Linstädter A. 2015.** Quantifying drylands' drought resistance and recovery:  
658 the importance of drought intensity, dominant life history and grazing regime.  
659 *Global Change Biology* **21**(3): 1258-1270.
- 660 **Sala OE, Lauenroth WK. 1982.** Small rainfall events: an ecological role in semiarid  
661 regions. *Oecologia* **53**: 301-304.

- 662 **Sardans J, Peñuelas J, Estiarte M, Prieto P. 2008.** Warming and drought alter C  
663 and N concentration, allocation and accumulation in a Mediterranean  
664 shrubland. *Global Change Biology* **14**(10): 2304-2316.
- 665 **Schiffers K, Tielbörger K. 2006.** Ontogenetic shifts in interactions among annual  
666 plants. *Journal of Ecology* **94**(2): 336-341.
- 667 **Schindler DE, Armstrong JB, Reed TE. 2015.** The portfolio concept in ecology and  
668 evolution. *Frontiers in Ecology and the Environment* **13**(5): 257-263.
- 669 **Shi Z, Sherry R, Xu X, Hararuk O, Souza L, Jiang LF, Xia JY, Liang JY, Luo**  
670 **YQ. 2015.** Evidence for long-term shift in plant community composition  
671 under decadal experimental warming. *Journal of Ecology* **103**(5): 1131-1140.
- 672 **Siewert W, Tielbörger K. 2010.** Dispersal-dormancy relationships in annual plants:  
673 putting model predictions to the test. *American Naturalist* **176**(4): 490-500.
- 674 **Smiatek G, Kunstmann H, Heckl A. 2011.** High-resolution climate change  
675 simulations for the Jordan River area. *Journal of Geophysical Research-*  
676 *Atmospheres* **116**.
- 677 **Spence LA, Liancourt P, Boldgiv B, Petraitis PS, Casper BB. 2016.** Short-term  
678 manipulation of precipitation in Mongolian steppe shows vegetation  
679 influenced more by timing than amount of rainfall. *Journal of Vegetation*  
680 *Science* **27**(2): 249-258.

- 681 **Sultan SE 1987.** Evolutionary Implications of Phenotypic Plasticity in Plants. In:  
682 Hecht MK, Wallace B, Prance GT eds. *Evolutionary Biology: Volume 21*.  
683 Boston, MA: Springer US, 127-178.
- 684 **Thompson PL, Beisner BE, Gonzalez A. 2015.** Warming induces synchrony and  
685 destabilizes experimental pond zooplankton metacommunities. *Oikos* **124**(9):  
686 1171-1180.
- 687 **Tielbörger K, Bilton MC, Metz J, Kigel J, Holzapfel C, Lebrija-Trejos E,**  
688 **Konsens I, Parag HA, Sternberg M. 2014.** Middle-Eastern plant  
689 communities tolerate 9 years of drought in a multi-site climate manipulation  
690 experiment. *Nature Communications* **5**.
- 691 **Tielbörger K, Petruš M, Lampei C. 2012.** Bet-hedging germination in annual plants:  
692 a sound empirical test of the theoretical foundations. *Oikos* **121**(11): 1860-  
693 1868.
- 694 **Tilman D, Downing JA. 1994.** Biodiversity and stability in grasslands. *Nature*  
695 **367**(6461): 363-365.
- 696 **Tilman D, Lehman CL, Bristow CE. 1998.** Diversity-stability relationships:  
697 statistical inevitability or ecological consequence? *The American Naturalist*  
698 **151**(3): 277-282.

- 699 **Tomiolo S, van der Putten WH, Tielbörger K. 2015.** Separating the role of biotic  
700 interactions and climate in determining adaptive response of plants to climate  
701 change. *Ecology* **96**(5): 1298-1308.
- 702 **Venables WN, Ripley BD, . 2002.** *Modern Applied Statistics with S* . New York,  
703 N.Y.: Springer.
- 704 **Waldrop MP, Firestone MK. 2006.** Response of microbial community composition  
705 and function to soil climate change. *Microbial Ecology* **52**(4): 716-724.
- 706 **Wetzel PR, Kitchens WM, Brush JM, Dusek ML. 2004.** Use a reciprocal transplant  
707 study to measure the rate of plant community change in a tidal marsh along a  
708 salinity gradient. *Wetlands* **24**(4): 879-890.
- 709 **Williams JW, Jackson ST. 2007.** Novel climates, no-analog communities, and  
710 ecological surprises. *Frontiers in Ecology and the Environment* **5**(9): 475-482.
- 711 **Wu ZT, Dijkstra P, Koch GW, Hungate BA. 2012.** Biogeochemical and ecological  
712 feedbacks in grassland responses to warming. *Nature Climate Change* **2**(6):  
713 458-461.
- 714 **Ziv B, Saaroni H, Pargament R, Harpaz T, Alpert P. 2014.** Trends in rainfall  
715 regime over Israel, 1975–2010, and their relationship to large-scale variability.  
716 *Regional Environmental Change* **14**(5): 1751-1764.
- 717
- 718

719 **Figures and tables**

720

721 **Table 1: Type III ANOVA table results for the models applied to individual density, species**  
722 **richness, species diversity, and total biomass. Lines correspond to response variables and**  
723 **columns to explanatory variables of each model. In each column the first value represent Chi-**  
724 **square test values and the second the p-value. Probability values for significant terms are**  
725 **reported in bold.**

|                   | <b>Origin</b>            | <b>Climate</b>          | <b>Origin x Climate</b> |
|-------------------|--------------------------|-------------------------|-------------------------|
| Density           | 312.86; <b>&lt;0.001</b> | 0.12; 0.72              | 0.59; 0.44              |
| Species richness  | 281.29; <b>&lt;0.001</b> | 12.99; <b>&lt;0.001</b> | 0.085; 0.77             |
| Species diversity | 130.41; <b>&lt;0.001</b> | 10.40; <b>0.001</b>     | 1.36; 0.24              |
| Total biomass     | 103.86; <b>0.001</b>     | 2.34; 0.13              | 4.66; <b>0.03</b>       |

726

727

728 **Table 2: Type III ANOVA table of results for Generalized Linear Models determining the effect**  
729 **of community origin, climate and Climatic Niche Group (CNG) on plant community densities**  
730 **establishing from seed bank.**

| Effect                 | DF | LR Chi-sq. | P-value          |
|------------------------|----|------------|------------------|
|                        |    | 236.9      |                  |
| Origin                 | 1  | 3          | <b>&lt;0.001</b> |
| Climate                | 1  | 2.35       | 0.12540          |
|                        |    | 343.2      |                  |
| CNG                    | 3  | 1          | <b>&lt;0.001</b> |
| Origin x Climate       | 1  | 0.07       | 0.78714          |
| Origin x CNG           | 3  | 83.55      | <b>&lt;0.001</b> |
| Climate x CNG          | 3  | 50.09      | <b>&lt;0.001</b> |
| Origin x Climate x CNG | 3  | 16.85      | <b>&lt;0.001</b> |

731

732

733

734

735

736

737

738

739

740

741

742

743

744

745

746

747

748

749

750

751

752

753 **Figure Captions:**

754 **Figure 1: Mean  $\pm$ 1SE A) species richness (i.e. number of species per plot), B) diversity C) total**  
755 **individual density, D) total biomass of annual plant communities established from two**  
756 **community origins ('M' Mediterranean; 'SA' Semi-Arid) grown in two sites (i.e. climates: 'M'**  
757 **Mediterranean; 'SA' Semi-Arid).**

758

759 **Figure 2: Graphical representation of Redundancy Analysis (RDA) showing species**  
760 **composition in community origins (M, SA) exposed to two different climates (M, SA). The**  
761 **ellipses represent the 95% confidence intervals for the groupings/categories. Fig. 2 a, b**  
762 **represents the plot centroids of each community origin-climate combination. Lines are vectors**  
763 **from the centre of a category to each site score (points). RDA-axis 1: correlated to distance**  
764 **between origins, RDA-axis 3: the effect of climate on SA community origins, and RDA-axis 2 the**  
765 **effect of climate on M community origins. In red: SA community origins - SA climate; yellow:**  
766 **SA origins - M climate; blue: M origins- M climate; green: M origins -SA climate. Fig. 2c**  
767 **represents the species centroids for each Climatic Niche Group (CNG). Lines are vectors**  
768 **connecting the centre of each group with species scores. In red: CNG1, yellow: CNG2, green:**  
769 **CNG3, blue: CNG4.**

770

771 **Figure 3: Impact of community origin, climate and Climatic Niche Group (CNG) on plant**  
772 **densities establishing from seed banks in home vs. away-from-home climate. Each Climatic Niche**  
773 **Group (CNG) aggregates species with similar climatic adaptation, ranging from dry climates**  
774 **(CNG 1) to wetter climates (CNG 4). Fig. 3 a, b: Total mean individuals' densities across climates**  
775 **and origins are broken down according to CNG abundances. Fig. 3 c-f: Shifts in the abundance**  
776 **of CNG densities across community origins (3c), climates (3d) and the combination of the two (3**  
777 **e, f). Shifts in densities of CNG groups are expressed as log ratios, thus visualizing changes in**  
778 **plant density on a relative scale. Positive values indicate higher CNG abundances in SA**  
779 **community origins or climate, whereas negative values indicate higher CNG abundances in M**  
780 **community origins or climate.**

781

782

783 **Figure A1: Dots on the map represent the three experimental sites. On the right hand, the**  
784 **the scheme of the community transplants at each sites. Communities (soil and relative seed bank)**  
785 **were transplanted between the home and the closest away-from-home site.**

786

787

788

789

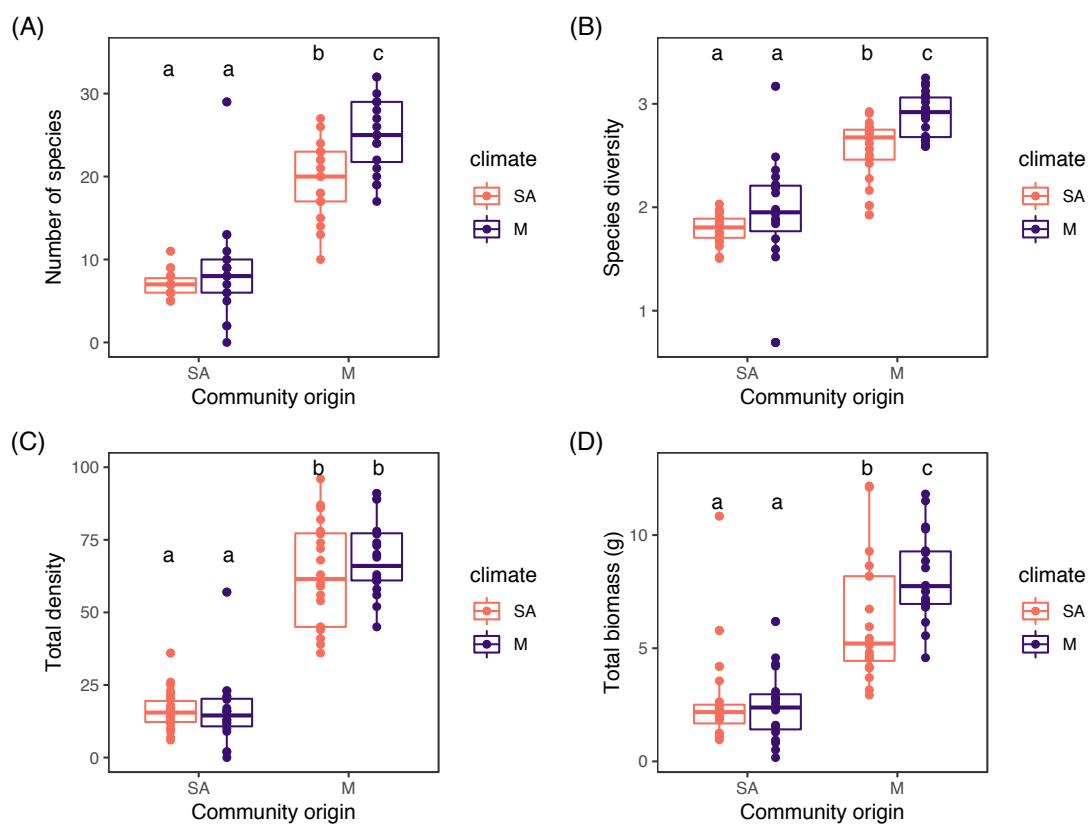

790

791

Figure 1

792



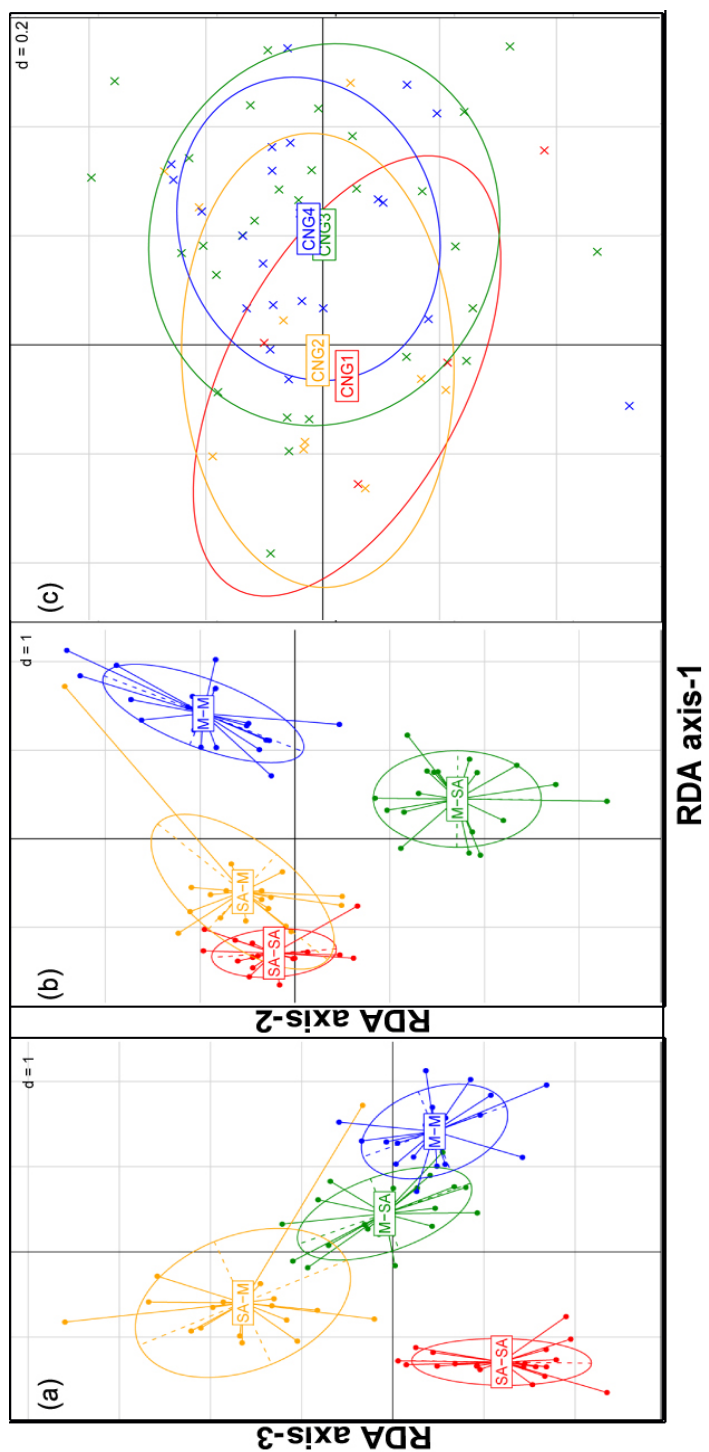

793  
794 **Figure 2**  
795  
796

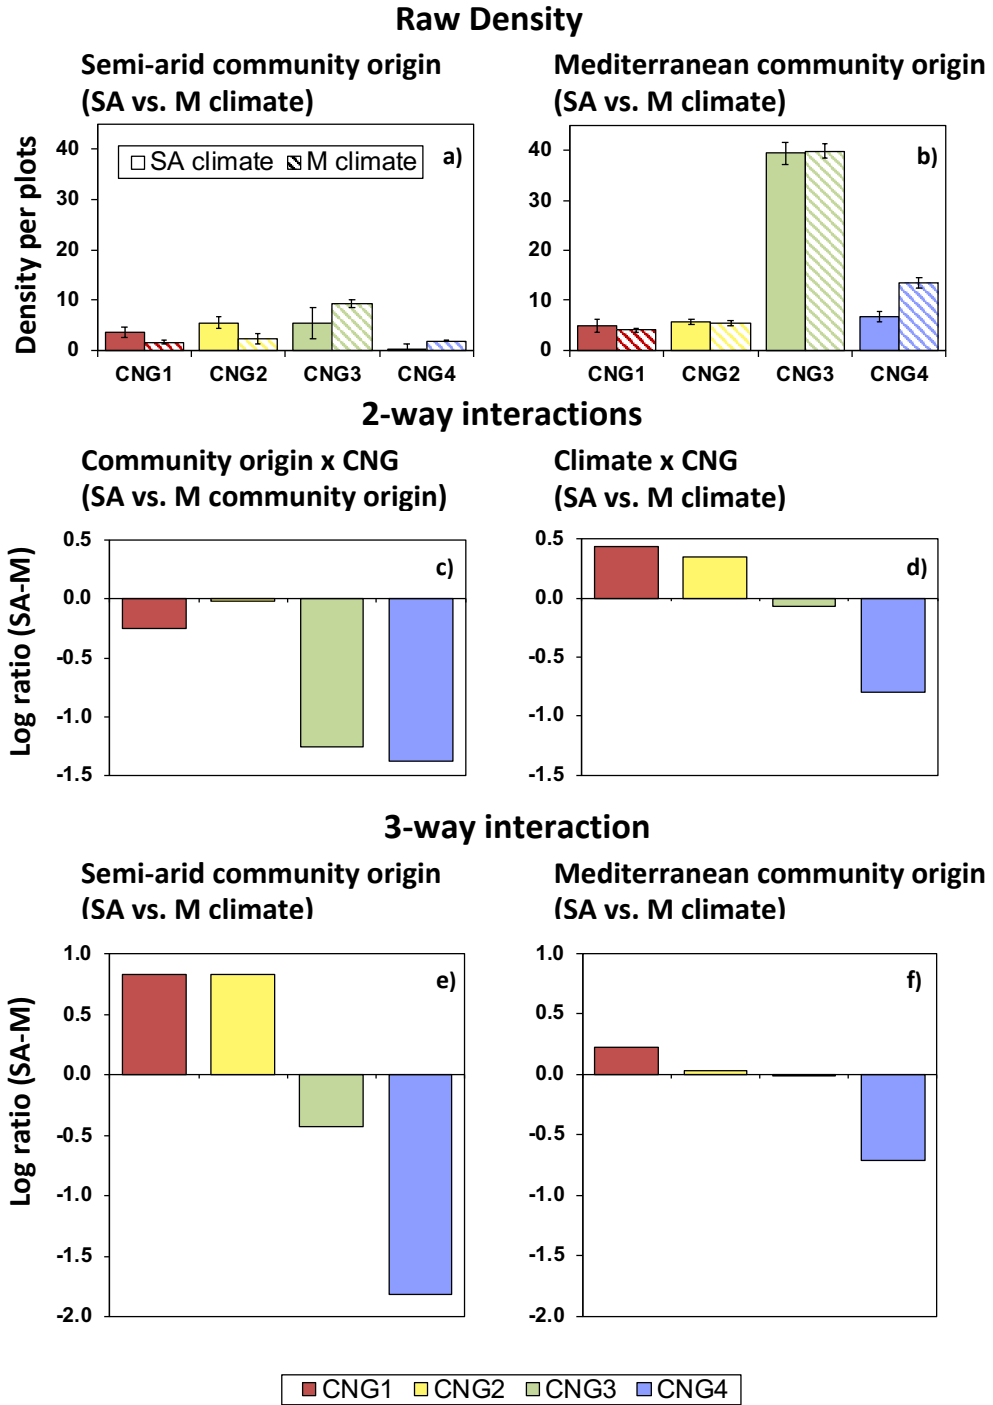

797

798 Figure 3
