# Supplementary material for: Whole plant community transplants across climates reveal structural community stability due to large shifts in species assemblage
Source: bioRxiv or medRxiv preprint supplement (doi:10.1101/475046), 2019-02-17
Supplement: Supplementary file [file media-1.pdf]

## 1 Appendix 2

2 **Table A1: List of species and relative Climatic Niche Group (CNG) found in each treatment (i.e.**  
 3 **community origin - climate combination). CNG boundaries were set following the classification**  
 4 **proposed by Bilton et al (2016). CNG1: 100-230 mm rainfall; CNG2: 230-360 mm; CNG3: 360-**  
 5 **490 mm; CNG4: 490-620 mm.**

| Species                          | Family          | Average rainfall (mm/year) | CNG | M-M | SA-M | M-SA | SA-SA |
|----------------------------------|-----------------|----------------------------|-----|-----|------|------|-------|
| <i>Reichardia tingitana</i>      | Asteraceae      | 179.3                      | 1   | x   |      |      | x     |
| <i>Stipa capensis</i>            | Poaceae         | 221.7                      | 1   | x   | x    | x    | x     |
| <i>Adonis dentata</i>            | Ranunculaceae   | 227.0                      | 1   |     |      | x    | x     |
| <i>Carrichtera annua</i>         | Brassicaceae    | 203.2                      | 1   |     | x    | x    | x     |
| <i>Plantago coronopus</i>        | Plantaginaceae  | 185.5                      | 1   |     |      |      | x     |
| <i>Schismus arabicus</i>         | Geraniaceae     | 146.9                      | 1   |     |      | x    | x     |
| <i>Cuscuta campestris</i>        | Convolvulaceae  | 488.1                      | 1   | x   | x    |      |       |
| <i>Picris damascena</i>          | Asteraceae      | 165.7                      | 1   | x   | x    | x    |       |
| <i>Astragalus tribuloides</i>    | Fabaceae        | 115.0                      | 1   |     | x    |      |       |
| <i>Erucaria rostrata</i>         | Brassicaceae    | 168.5                      | 1   |     | x    |      |       |
| <i>Filago desertorum</i>         | Brassicaceae    | 122.5                      | 1   |     |      |      |       |
| <i>Gagea reticulata</i>          | Liliaceae       | 143.7                      | 1   |     |      | x    |       |
| <i>Pteranthus dichotomus</i>     | Caryophyllaceae | 120.3                      | 1   |     | x    |      |       |
| <i>Atractylis cancellata</i>     | Asteraceae      | 361.1                      | 2   | x   | x    | x    | x     |
| <i>Bromus fasciculatus</i>       | Poaceae         | 302.9                      | 2   | x   | x    | x    | x     |
| <i>Hippocrepis unisiliquosa</i>  | Fabaceae        | 341.3                      | 2   | x   | x    | x    | x     |
| <i>Onobrychis crista-galli</i>   | Fabaceae        | 279.3                      | 2   | x   | x    | x    | x     |
| <i>Trisetaria macrochaeta</i>    | Poaceae         | 244.5                      | 2   | x   | x    |      | x     |
| <i>Crithopsis delileana</i>      | Poaceae         | 302.1                      | 2   |     |      | x    | x     |
| <i>Filago contracta</i>          | Brassicaceae    | 342.9                      | 2   |     | x    | x    | x     |
| <i>Filago palaestina</i>         | Brassicaceae    | 344.4                      | 2   |     |      |      | x     |
| <i>Helianthemum aegytiacum</i>   | Cistaceae       | 360.2                      | 2   | x   |      |      |       |
| <i>Helianthemum salicifolium</i> | Cistaceae       | 347.9                      | 2   | x   | x    | x    |       |
| <i>Malva parviflora</i>          | Malvaceae       | 235.0                      | 2   | x   |      | x    |       |
| <i>Astragalus asterias</i>       | Fabaceae        | 278.2                      | 2   |     | x    |      |       |
| <i>Calendula sp.</i>             | Asteraceae      | 349.1                      | 2   |     |      | x    |       |
| <i>Hedysarum spinosissimum</i>   | Fabaceae        | 347.6                      | 2   |     | x    |      |       |
| <i>Aegilops peregrina</i>        | Poaceae         | 478.9                      | 3   | x   | x    | x    | x     |
| <i>Anagallis arvensis</i>        | Primulaceae     | 429.5                      | 3   | x   | x    | x    | x     |
| <i>Biscutella didyma</i>         | Brassicaceae    | 449.4                      | 3   | x   | x    | x    | x     |
| <i>Brachypodium distachyon</i>   | Poaceae         | 413.1                      | 3   | x   | x    | x    | x     |
| <i>Hymenocarpos circinnatus</i>  | Fabaceae        | 443.6                      | 3   | x   | x    | x    | x     |
| <i>Plantago afra</i>             | Plantaginaceae  | 403.7                      | 3   | x   | x    | x    | x     |

|                                    |                |       |   |   |   |   |   |
|------------------------------------|----------------|-------|---|---|---|---|---|
| <i>Plantago cretica</i>            | Plantaginaceae | 468.2 | 3 | x | x |   | x |
| <i>Rhagadiolus stellatus</i>       | Asteraceae     | 446.7 | 3 | x | x | x | x |
| <i>Rostraria cristata</i>          | Poaceae        | 469.5 | 3 | x | x | x | x |
| <i>Sedum pallidum</i>              | Rubiaceae      | 438.8 | 3 | x | x | x | x |
| <i>Medicago truncatula</i>         | Fabaceae       | 484.1 | 3 |   | x |   | x |
| <i>Medicago tuberculata</i>        | Fabaceae       | 484.6 | 3 |   | x |   | x |
| <i>Trigonella monspeliaca</i>      | Fabaceae       | 438.5 | 3 |   |   |   | x |
| <i>Vulpia ciliata</i>              | Poaceae        | 445.2 | 3 |   |   |   | x |
| <i>Avena sterilis</i>              | Poaceae        | 460.9 | 3 | x | x | x |   |
| <i>Cichorium pumilum</i>           | Asteraceae     | 471.9 | 3 | x |   |   |   |
| <i>Clypeola jonthlaspi</i>         | Brassicaceae   | 391.2 | 3 | x |   | x |   |
| <i>Convolvulus siculus</i>         | Convolvulaceae | 428.4 | 3 | x | x | x |   |
| <i>Coronilla scorpioides</i>       | Fabaceae       | 473.6 | 3 | x |   | x |   |
| <i>Crepis sancta</i>               | Asteraceae     | 466.1 | 3 | x |   | x |   |
| <i>Erodium malacoides</i>          | Geraniaceae    | 472.2 | 3 | x |   | x |   |
| <i>Galium judaicum</i>             | Rubiaceae      | 485.7 | 3 | x | x | x |   |
| <i>Hedypnois rhagadioloides</i>    | Asteraceae     | 405.0 | 3 | x | x | x |   |
| <i>Helianthemum stipulatum</i>     | Cistaceae      | 373.7 | 3 | x |   |   |   |
| <i>Linum strictum</i>              | Linaceae       | 464.0 | 3 | x | x | x |   |
| <i>Lolium rigidum</i>              | Poaceae        | 481.4 | 3 | x | x | x |   |
| <i>Medicago coronata</i>           | Fabaceae       | 458.7 | 3 | x | x |   |   |
| <i>Onobrychis caput galli</i>      | Fabaceae       | 479.5 | 3 | x | x |   |   |
| <i>Scorpiurus muricatus</i>        | Fabaceae       | 447.8 | 3 | x | x | x |   |
| <i>Torilis tenella</i>             | Apiaceae       | 474.0 | 3 | x | x | x |   |
| <i>Urospermum picroides</i>        | Asteraceae     | 457.6 | 3 | x | x | x |   |
| <i>Valantia hispida</i>            | Rubiaceae      | 448.0 | 3 | x | x | x |   |
| <i>Gynandriris sisyrrhinchium</i>  | Iridaceae      | 399.4 | 3 |   |   | x |   |
| <i>Plantago lagopus</i>            | Plantaginaceae | 474.6 | 3 |   | x |   |   |
| <i>Ranunculus asiaticus</i>        | Ranunculaceae  | 437.9 | 3 |   |   | x |   |
| <i>Cephalaria joppensis</i>        | Dipsacaceae    | 574.0 | 4 | x | x | x | x |
| <i>Hordeum bulbosum</i>            | Poaceae        | 540.3 | 4 | x | x | x | x |
| <i>Medicago rotata</i>             | Fabaceae       | 506.4 | 4 | x | x |   | x |
| <i>Sarcopoterium spinosum</i>      | Rosaceae       | 511.3 | 4 | x | x | x | x |
| <i>Trisetaria michelii</i>         | Poaceae        | 556.7 | 4 |   |   | x | x |
| <i>Althaea hirsuta</i>             | Malvaceae      | 602.2 | 4 | x | x |   |   |
| <i>Convolvulus pentapetaloides</i> | Convolvulaceae | 498.3 | 4 | x | x | x |   |
| <i>Crupina crupinastrum</i>        | Asteraceae     | 535.6 | 4 | x | x |   |   |
| <i>Geranium rotundifolia</i>       | Geraniaceae    | 544.9 | 4 | x |   |   |   |
| <i>Geropogon hybridus</i>          | Asteraceae     | 520.8 | 4 | x |   |   |   |
| <i>Linum corymbosum</i>            | Linaceae       | 569.2 | 4 | x |   | x |   |
| <i>Linum pubescens</i>             | Linaceae       | 557.9 | 4 | x | x |   |   |
| <i>Lotus peregrinus</i>            | Fabaceae       | 508.5 | 4 | x | x | x |   |

|                                 |               |       |    |   |   |   |   |
|---------------------------------|---------------|-------|----|---|---|---|---|
| <i>Mentha longifolia</i>        | Lamiaceae     | 547.4 | 4  | x |   | x |   |
| <i>Mercurialis annua</i>        | Euphorbiaceae | 504.1 | 4  | x |   |   |   |
| <i>Onobrychis squarrosa</i>     | Fabaceae      | 509.7 | 4  | x |   |   |   |
| <i>Scabiosa palaestina</i>      | Dipsacaceae   | 515.2 | 4  | x |   |   |   |
| <i>Scandix iberica</i>          | Apiaceae      | 604.9 | 4  | x |   |   |   |
| <i>Stachys neurocalycina</i>    | Lamiaceae     | 576.9 | 4  | x |   |   |   |
| <i>Theligonum cynocrambe</i>    | Theligonaceae | 515.6 | 4  | x | x |   |   |
| <i>Trifolium campestre</i>      | Fabaceae      | 502.2 | 4  | x |   |   | x |
| <i>Trifolium pilulare</i>       | Fabaceae      | 575.2 | 4  | x | x |   | x |
| <i>Trifolium purpureum</i>      | Fabaceae      | 526.7 | 4  | x | x |   | x |
| <i>Trifolium scabrum</i>        | Fabaceae      | 545.2 | 4  | x | x |   | x |
| <i>Trifolium stellatum</i>      | Fabaceae      | 533.0 | 4  | x | x |   | x |
| <i>Tripodion tetraphyllum</i>   | Fabaceae      | 536.7 | 4  | x |   |   |   |
| <i>Vicia palaestina</i>         | Fabaceae      | 561.1 | 4  | x | x |   |   |
| <i>Bromus japonicus</i>         | Poaceae       | 503.8 | 4  |   |   |   | x |
| <i>Crucianella macrostachya</i> | Rubiaceae     | 494.3 | 4  |   |   |   | x |
| <i>Nigella ciliaris</i>         | Ranunculaceae | 547.5 | 4  |   | x |   |   |
| <i>Pallenis spinosa</i>         | Asteraceae    | 572.5 | 4  |   | x |   |   |
| <i>Senecio vernalis</i>         | Asteraceae    | 526.9 | 4  |   |   |   | x |
| <i>Erodium sp.</i>              | Geraniaceae   | NA    | NA | x |   | x | x |
| <i>Allium sp.</i>               | Liliaceae     | NA    | NA |   | x | x | x |
| <i>Asphodelus sp.</i>           | Liliaceae     |       | NA |   | x |   |   |

6

7

8

9

10

11

12

13

14

15

16

17

18

19

20 **Table A2: Mean number  $\pm$  SE of individuals across Climatic Niche Groups (CNG) emerging in**  
 21 **each combination of community origin - climate**

22

| <b>semi-arid community origin</b>     |                 |                 |                  |                  |
|---------------------------------------|-----------------|-----------------|------------------|------------------|
|                                       | <b>CNG1</b>     | <b>CNG2</b>     | <b>CNG3</b>      | <b>CNG4</b>      |
| <b>SA (home site)</b>                 | 3.55 $\pm$ 0.48 | 5.5 $\pm$ 0.98  | 5.35 $\pm$ 0.73  | 0.30 $\pm$ 0.20  |
| <b>M (away-from-home site)</b>        | 1.57 $\pm$ 0.39 | 2.42 $\pm$ 0.47 | 8.26 $\pm$ 1.41  | 1.94 $\pm$ 1.08  |
| <b>Mediterranean community origin</b> |                 |                 |                  |                  |
|                                       | <b>CNG1</b>     | <b>CNG2</b>     | <b>CNG3</b>      | <b>CNG4</b>      |
| <b>M (home site)</b>                  | 4.0 $\pm$ 1.3   | 5.5 $\pm$ 0.55  | 39.90 $\pm$ 2.21 | 13.55 $\pm$ 1.07 |
| <b>SA (away-from-home site)</b>       | 5.0 $\pm$ 0.92  | 5.6 $\pm$ 1.06  | 39.55 $\pm$ 3.14 | 6.65 $\pm$ 0.89  |

23

24

25

26

27

28

29

30

31

32
