# Supplementary material for: Whole plant community transplants across climates reveal structural community stability due to large shifts in species assemblage
Source: bioRxiv or medRxiv preprint supplement (doi:10.1101/475046), 2019-02-17

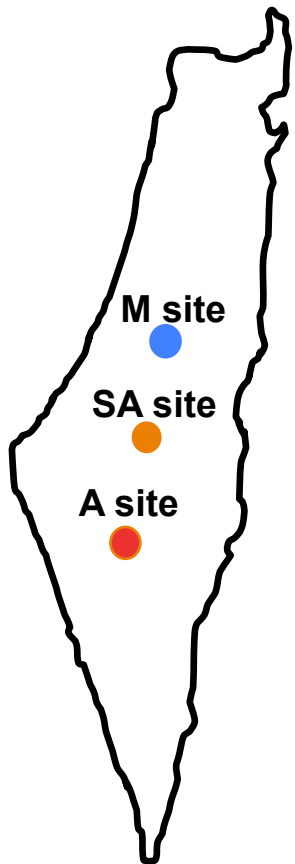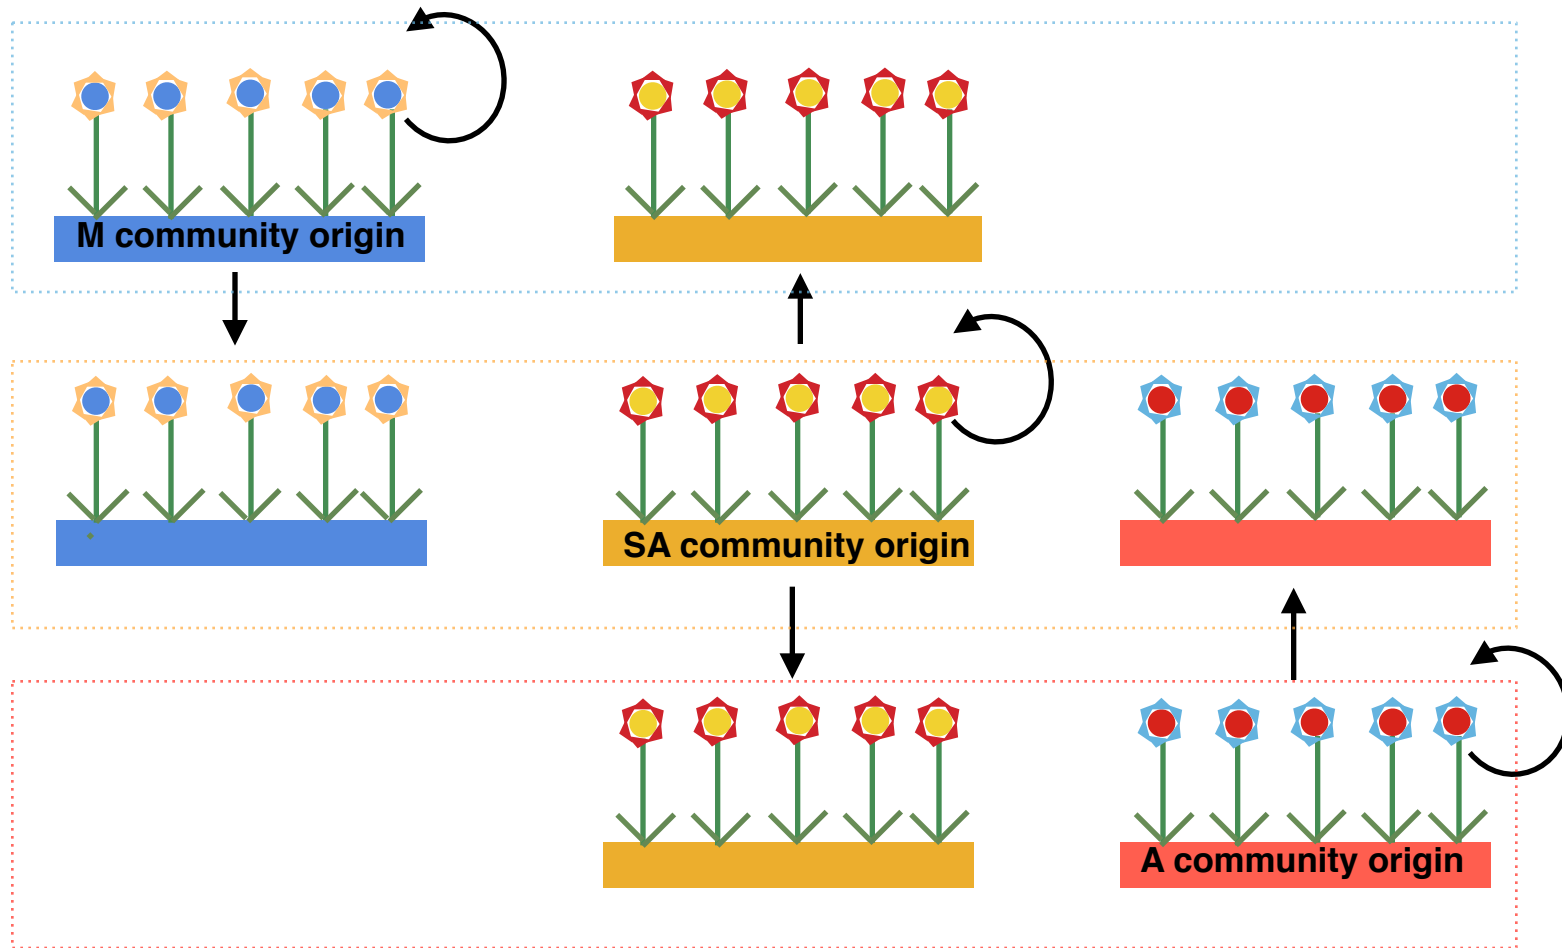

Supplement: Supplementary file [file media-2.pdf]
